**1 Secreted microbial metabolites modulate gut immunity and inflammatory tone**

**2** Rabina Giri<sup>1,2</sup>, Emily C. Hoedt<sup>2,3</sup>, Khushi Shamsunnahar<sup>4</sup>, Michael A. McGuckin<sup>1,2</sup>, Mark  
**3** Morrison<sup>2,3</sup>, Robert J. Capon<sup>4</sup>, Jakob Begun<sup>1,2#</sup> and Páraic Ó Cuív<sup>2,3#</sup>

**4** <sup>1</sup>Mater Research Institute – The University of Queensland, Translational Research Institute,  
**5** Brisbane, QLD, Australia

**6** <sup>2</sup>Faculty of Medicine, The University of Queensland, St. Lucia, QLD, Australia

**7** <sup>3</sup>The University of Queensland Diamantina Institute, The University of Queensland,  
**8** Translational Research Institute, Brisbane, QLD, Australia

**9** <sup>4</sup>The Institute for Molecular Bioscience, The University of Queensland, Brisbane, QLD,  
**10** Australia

**11** #Equal contribution

**12** Corresponding authors: Jakob Begun (Immunology, [jakob.begun@mater.uq.edu.au](mailto:jakob.begun@mater.uq.edu.au)) & Páraic  
**13** Ó Cuív (Microbiology, [paraic.ocuiv@gmail.com](mailto:paraic.ocuiv@gmail.com))

**14** Keywords: Crohn's disease, Ulcerative colitis, Anti-inflammatory, NF-κB, Gut microbiota,  
**15** Bioactive

**16** Running title: Production of NF-κB suppressive bioactives by the human gut microbiota

**17** Current addresses: **ECH**, APC Microbiome Institute & Department of Microbiology, National  
**18** University of Ireland, Cork, Ireland; **MMcG**, The University of Melbourne, Victoria,  
**19** Australia; **PÓC**, Microba Life Sciences Ltd, Queensland, Australia.

## 20 Abstract

21 Evidence is emerging that microbiome-immune system crosstalk regulates the tenor of host  
22 intestinal immunity and predisposition to inflammatory bowel disease (IBD). We identified  
23 five NF- $\kappa$ B suppressive strains affiliated with *Clostridium* clusters IV, XIVa and XV that  
24 independently suppressed secretion of the chemokine IL-8 by peripheral blood mononuclear  
25 cells and gut epithelial organoids from healthy human subjects, as well as patients with the  
26 predominant IBD subtypes, Crohn's disease and ulcerative colitis. The NF- $\kappa$ B suppressive  
27 *Clostridium bolteae* AHG0001, but not *C. bolteae* BAA-613, suppressed cytokine-driven  
28 inflammatory responses and endoplasmic reticulum stress in gut epithelial organoids derived  
29 from *Winnie* mice that develop spontaneous colitis. This predicted *in vivo* responses thereby  
30 validating a precision medicine approach to treat *Winnie* colitis and suggesting the microbiome  
31 may function as an extrinsic regulator of host immunity. Finally, we identified a novel  
32 molecule associated with NF- $\kappa$ B suppression indicating gut bacteria could be harnessed to  
33 develop new therapeutics.

## 34 Introduction

35 The human gut is the largest immune organ of the body and gut epithelial cells play a key role  
36 in the establishment and maintenance of gut homeostasis, as well as rapid responses to  
37 infection<sup>1</sup>. The gut is colonised by a diverse microbiota that has co-evolved with its host and  
38 forms a durable symbiotic relationship through its modulation of innate and adaptive immune  
39 responses<sup>2, 3</sup>. However, with a few notable exceptions<sup>4, 5</sup> the microbes and microbial  
40 determinants of immune tone remain cryptic.

41 Inflammatory bowel disease (IBD) is comprised of two predominant subtypes, termed Crohn's  
42 disease (CD) and ulcerative colitis (UC), that are characterised by relapsing and remitting gut

43 inflammation. The Nuclear factor- $\kappa$ B (NF- $\kappa$ B) family of transcription factors are master  
44 regulators of gut epithelial integrity and inflammation, activation of antigen presenting cells  
45 and effector leukocytes, and are important contributors to the pathogenesis of IBD. Upon  
46 activation, NF- $\kappa$ B dimers translocate to the nucleus where they regulate transcription of a wide  
47 range of genes including those involved in immune and inflammatory responses<sup>6</sup>. In the  
48 healthy gut, NF- $\kappa$ B activation is tightly regulated<sup>7</sup> however several IBD genetic risk alleles  
49 including *nod2*, *TOLLIP* and *A20* exert their pathogenic effects at least in part through  
50 dysregulated NF- $\kappa$ B signalling<sup>8</sup>. Additionally, CD disease phenotype correlates with NF- $\kappa$ B  
51 activation<sup>9</sup>, and macrophages and epithelial cells isolated from inflamed intestine of CD and  
52 UC subjects show increased activation of nuclear NF- $\kappa$ B-p65<sup>10</sup>. As such, NF- $\kappa$ B signalling  
53 contributes significantly to the cascade of host-responses underlying the pathogenesis of IBD.

54 The gut microbiota is increasingly recognised as an important contributory risk factor for IBD.  
55 Underlying this, the healthy and IBD gut microbiota differ and are characterised by structure-  
56 function alterations to the microbiota<sup>11 12</sup>, and faecal transplantation has proven effective in  
57 some patients with UC<sup>13,14</sup>. Such findings suggest that key members of the microbiota regulate  
58 host inflammatory responses. Indeed, several bacterial taxa are not only more abundant in the  
59 healthy gut but can also suppress inflammatory responses and alleviate inflammation in animal  
60 models of disease<sup>15-17</sup>. These “anti-inflammatory” properties are best characterised for the gut  
61 bacterium *Faecalibacterium prausnitzii* A2-165 which produces secreted peptides derived  
62 from the Mam protein that suppress NF- $\kappa$ B in human gut epithelial cells and murine colitis<sup>18</sup>.

63 However, while Firmicutes-affiliated Clostridia are amongst the most abundant and  
64 functionally diverse gut bacteria, Mam is largely restricted to members of *Faecalibacterium*  
65 spp., and much remains to be discovered about the immunomodulatory capacities inherent to  
66 other Firmicutes.

67 Here, we identified five new Firmicutes isolates that are comparable to *F. prausnitzii* A2-165  
68 in their NF- $\kappa$ B suppressive potency, and whose activities are characterised by strain specific  
69 differences. Notably, these bacteria suppressed cytokine mediated IL-8 secretion in CD and  
70 UC derived organoid cultures and peripheral blood mononuclear cells (PBMCs). Based on  
71 these observations, we demonstrated using two *Clostridium bolteae* strains how a “precision  
72 medicine” approach can be used to predict immunomodulatory and mucosal healing bioactivity  
73 *in vivo* using the Winnie murine model of spontaneous colitis, demonstrating the potential of  
74 bioprospecting the human microbiome for therapeutic leads.

## 75 **Results**

76 **Gut clostridia can suppress NF- $\kappa$ B.** We assessed the NF- $\kappa$ B suppressive capacity of cell free  
77 supernatants (CS) derived from 23 Firmicutes affiliated gut bacteria previously isolated by us  
78 via metaparental mating from a healthy pre-adolescent child<sup>19</sup>. The isolates were principally  
79 affiliated with *Clostridium* cluster XIVa, with several isolates also affiliated with clusters IV,  
80 XV and XVIII. The isolates are distantly related to *F. prausnitzii* A2-165 and another NF- $\kappa$ B  
81 suppressive bacterium, *Enterococcus faecalis* AHG0090, that was also isolated by  
82 metaparental mating<sup>20</sup> (Figure 1A).

83 We assessed the ability of individual isolates to suppress NF- $\kappa$ B activation using LS174T  
84 goblet cell-like and Caco-2 enterocyte like reporter cell lines<sup>21</sup>. The LS174T and Caco-2 cells  
85 carry an NF- $\kappa$ B inducible luciferase reporter gene and are responsive to TNF $\alpha$  and IL-1 $\beta$   
86 stimulation, respectively<sup>20, 21</sup>. Although short chain fatty acids are posited to suppress gut  
87 inflammation, similar to previous reports<sup>22</sup>, the addition of up to 16 mM of the short chain fatty  
88 acids acetate, butyrate and propionate did not activate NF- $\kappa$ B under basal conditions.  
89 However, all three short chain fatty acids enhanced cytokine-driven NF- $\kappa$ B activation in a

90 largely dose dependent manner (Supplementary Figure 1A-F). CS prepared from isolates  
91 following growth in Modified Clostridial Medium (MCM) or Brain Heart Infusion (BHI)  
92 medium were assessed for their ability to suppress NF- $\kappa$ B (Figure 1B). As previously  
93 observed<sup>20,21</sup>, there was a high degree of concordance between the LS174T and Caco-2 reporter  
94 cell lines with 7 strains identified that exhibited potent activities similar to *F. prausnitzii* A2-  
95 165 (Figure 1C, Z score  $\leq$ -3). In addition to *F. prausnitzii* A2-165, the isolates *C. bolteae*  
96 AHG0001, *Clostridium citroniae* AHG0002 *Pseudoflavonifractor* sp. AHG0008, *Clostridium*  
97 *aldenense* AHG0011, *Eubacterium limosum* AHG0013 and *E. limosum* AHG0017 suppressed  
98 NF- $\kappa$ B in both cell lines when grown in MCM and/or BHI medium (Figure 1C, Z score  $\leq$ -3).  
99 The first pass screen was confirmed with CS prepared from individual isolates following  
100 growth in MCM or BHI suppressing NF- $\kappa$ B activation in both cell lines (Figure 1D-E,  
101  $p < 0.0001$ ). As anticipated, the NF- $\kappa$ B inhibitor indole-3-carbinol (I3C) and *F. prausnitzii* A2-  
102 165 suppressed cytokine-driven activation of the luciferase reporter in the LS174T and Caco-  
103 2 cell lines (Figure 1D-E,  $p < 0.0001$ ). Consistent with the reporter assay results, all the isolates  
104 suppressed induction of the NF- $\kappa$ B regulated genes *mcp-1*, *il-6* and *il-8* in Caco-2 (Figure 1F)  
105 and LS174T (Supplementary Figure 1G) cells following stimulation. Critically, none of the  
106 CS exhibited cytotoxic effects (Supplementary Figure 1H-I).

107 We also examined the NF- $\kappa$ B suppressive activity of CS prepared from the widely used  
108 probiotic strains *Lactobacillus rhamnosus* GG (LGG), *Lactobacillus casei* Shirota (LCS),  
109 *Escherichia coli* Nissle 1917 (Nissle) and *Bifidobacterium animalis* subsp. *lactis* BB-12  
110 (Bifido). Notably, none of these strains suppressed cytokine driven NF- $\kappa$ B activation (Figure  
111 1G) potentially explaining the limited efficacy of probiotics for the treatment of IBD<sup>23-27</sup>.

112 **NF- $\kappa$ B suppression is strain specific.** Having confirmed their suppressive activity, we next

113 examined the intraspecies variations in NF- $\kappa$ B suppressive capacity. Isolates *C. bolteae*  
114 AHG0001 and ATCC BAA-613 (OTU1), *C. citroniae* AHG0002 and AHG0004 (OTU2), and  
115 *C. aldenense* AHG0011 and AHG0005 (OTU3) are assigned to the same operational taxonomic  
116 units (Figure 1A,  $\geq 97\%$  16S rRNA sequence identity). However, these OTUs were  
117 characterised by marked intraspecies differences in their NF- $\kappa$ B suppressive capacities (Figure  
118 2A-C). Next, we examined the apparent effect of growth medium on the suppressive effects  
119 of *C. bolteae* AHG0001 and *C. citroniae* AHG0002 in the first pass screen. We determined  
120 that CS prepared from *C. bolteae* AHG0001 and *C. citroniae* AHG0002 following growth in  
121 MCM but not BHI suppressed TNF $\alpha$ -driven mediated NF- $\kappa$ B activation in LS174T cells  
122 (Figure 2D). Conversely, CS prepared from these strains following growth in BHI but not  
123 MCM suppressed IL-1 $\beta$ -driven NF- $\kappa$ B activation in Caco-2 cells (Figure 2E). Thus, NF- $\kappa$ B  
124 suppressive functionality is strain specific and nutritional influences on bioactive production  
125 may affect the production of suppressive activity *in vitro* and the extent of anti-inflammatory  
126 activity *in situ* in the gut.

127 We examined our collection of suppressive CS by a combination of size fractionation,  
128 proteinase K and heat treatments to determine their biochemical characteristics. Using this  
129 approach, we determined that the NF- $\kappa$ B suppressive activity for all strains except  
130 *Pseudoflavonifractor* sp. AHG0008 was predominantly associated with the  $<3$  kDa fraction  
131 (Figure 2F-K, Supplementary Results). Gut bacteria produce a structurally diverse array of  
132 low molecular weight NF- $\kappa$ B suppressive bioactives<sup>18, 20, 28</sup> and we focused on the  $<3$  kDa  
133 fraction as we believed these bioactives would be more amenable to drug development. We  
134 concluded that these bioactives could be broadly separated into two classes based on heat and  
135 protease sensitivity (e.g. *F. prausnitzii* A2-165, *C. aldenense* AHG0011) or resilience (e.g. *C.*  
136 *bolteae* AHG0001, *C. citroniae* AHG0002, and *E. limosum* AHG0017), possibly inclusive of

137 both peptides and/or thermal and hydrolytically stable small molecules, respectively (Figures  
138 2F-J, Supplementary Results). We sequenced the strains producing <3 kDa bioactives to near  
139 completeness to identify candidate bioactive encoding biosynthetic gene clusters (BGCs)  
140 (Table 1). Phylogenetic analysis using the Genome Taxonomy Database (GTDB) confirmed  
141 the 16S rRNA based assignments (Supplementary Figure 2A). We also determined that the  
142 strains exhibited a high degree of genome synteny with their near relatives (Supplementary  
143 Figure 2B-E) and carried multiple BGCs (Table 1). None of the isolates encoded *F. prausnitzii*  
144 Mam-like orthologs which is consistent with its narrow phylogenetic distribution<sup>18, 29</sup>.

145 **CS suppress *ex vivo* IL-8 secretion.** IBD is challenging to treat due to the variability of  
146 response to available medications. A proportion of this variability is related to underlying  
147 genetic susceptibilities which likely drive their evolved immunophenotype and host-microbiota  
148 relationship<sup>30, 31</sup>. To assess whether the suppressive CS could affect epithelial inflammatory  
149 responses in primary cells in the context of IBD associated genetic risk factors we assessed  
150 their ability to prevent IL-1 $\beta$  driven IL-8 production in healthy (n=6), CD (n=5) and UC (n=5)  
151 derived primary intestinal epithelial organoid cultures. Interestingly, despite removal from the  
152 inflammatory environment, there was significantly higher basal IL-8 production by organoids  
153 derived from CD patients compared to those from non-IBD controls and UC patients (Figure  
154 3A). Following stimulation with IL-1 $\beta$  there was a significantly more IL-8 produced by  
155 organoids derived from UC but not CD when compared to healthy subjects (Figure 3B). As  
156 expected, IL-8 secretion was significantly inhibited by I3C, but not MCM in healthy, CD and  
157 UC subjects. Treatment with *F. prausnitzii* A2-165 CS resulted in significantly suppressed IL-  
158 8 secretion when compared to the MCM control in healthy and CD but not UC subjects (Figure  
159 3C-E). Treatment with CS from *C. aldenense* AHG0011, *C. citroniae* AHG0002, *E. limosum*  
160 AHG0017, *C. bolteae* AHG0001 and *Pseudoflavonifractor sp.* AHG0008 significantly

161 suppressed IL-8 secretion in healthy, CD and UC subjects, to an equivalent or greater degree  
162 than *F. prausnitzii* A2-165 (Figure 3C-E). There was a high degree of concordance in the  
163 degree of suppression between subjects within bacterial CS, in all subject groups, although  
164 some subject specific differences were noted (Supplementary Figure 3A). Critically, we did  
165 not observe any significant cytotoxic effects from the CS treatments (Supplementary Figure  
166 3B-D).

167 In addition to effects on the epithelium, bioactives produced by gut bacteria may also be  
168 absorbed and have systemic effects on immune cells. Therefore, the suppressive effects of the  
169 CS on primary immune cells was examined using PBMCs collected from healthy, CD and UC  
170 (n=6 per group) subjects. While the basal concentrations of IL-8 released by PBMC from all  
171 three groups were not significantly different (Figure 3F), their stimulation with TNF $\alpha$  resulted  
172 in more IL-8 released from the PBMCs of the CD group in comparison to those prepared from  
173 the healthy or UC groups (Figure 3G). As expected, IL-8 secretion by PBMCs from healthy,  
174 CD and UC subjects was significantly inhibited by I3C and *F. prausnitzii* A2-165 CS (Figure  
175 3H-J). Similarly, IL-8 secretion by PBMCs from healthy, CD and UC subjects was suppressed  
176 by treatment with CS from *C. aldenense* AHG0011, *C. citroniae* AHG0002, *E. limosum*  
177 AHG0017, *C. bolteae* AHG0001 and *Pseudoflavonifractor* sp. AHG0008; at least as  
178 effectively as *F. prausnitzii* A2-165 (Figure 3H-J). There was limited variation in the response  
179 to CS within the healthy, CD and UC subject groups although there were some subjects that  
180 showed varying levels of suppression with individual CS (Supplementary Figure 4A).  
181 Critically, we also did not observe any significant cytotoxic effects from the CS treatments on  
182 PBMCs (Supplementary Figure 4B-D). Collectively, these results show that the CS of these  
183 strains can suppress cytokine mediated inflammatory responses in the gut and immune  
184 compartments in both an IBD and non-IBD genetic background.



185 **Precision treatment of murine colitis.** The NF- $\kappa$ B pathway is highly conserved in mammals  
186 and we next examined the ability of the CS to suppress IL-1 $\beta$  induced expression of the NF-  
187  $\kappa$ B regulated genes *Mip-2* and *Cxcl-10* in C57/B16 derived murine organoids. All the CS tested  
188 suppressed induction, suggesting that the bioactives likely act through conserved mammalian  
189 cell targets (Figure 4A-B). We also examined the ability of the CS to suppress expression of  
190 *Mip-2* and *Cxcl-10* in organoids derived from *Winnie* mice. *Winnie* mice carry a missense  
191 mutation in *Muc2* that results in protein misfolding, endoplasmic reticulum (ER) stress and  
192 defects in gut barrier function. These mice develop a spontaneous colitis characteristic of UC  
193 and are an excellent preclinical model for human treatments<sup>32-34</sup>. We found that the majority  
194 of CS significantly suppressed IL-1 $\beta$  induced expression of *Mip-2* and *Cxcl-10* on *Winnie*  
195 derived organoids. However, in contrast to the findings in wild-type organoids, CS from *C.*  
196 *aldenense* AHG0011 and *F. prausnitzii* A2-165 did not suppress *Mip-2* and *Cxcl-10* (Figure  
197 4C-D). Furthermore, using *Winnie* derived gut epithelial organoids we determined *C. bolteae*  
198 AHG0001 but not *C. bolteae* ATCC BAA-613 CS suppressed induction of *Mip-2* and *Cxcl-10*  
199 expression, confirming the strain specific differences observed in the reporter cell lines (Figure  
200 4E). Interestingly, we also determined that *C. bolteae* AHG0001 but not *C. bolteae* ATCC  
201 BAA-613 CS suppressed induction of the ER stress markers, *Grp78* and *sXbp1*, in *Winnie*  
202 organoids (Figure 4E).

203 We hypothesised that functional capacity rather than phylogeny would be the principle  
204 determinant of therapeutic efficacy and that primary organoid cultures could be used to predict  
205 *in vivo* host responses to select CS in a precision medicine-based manner. To test this, CS  
206 prepared from *C. bolteae* AHG0001 and ATCC BAA-613 were administered intrarectally for  
207 14 days to 6-week old *Winnie* mice with established colitis, as demonstrated by the elevated  
208 diarrhoea scores at the start of the experiment (Figure 4F). *C. bolteae* AHG0001 CS

209 significantly reduced diarrhoea scores over the course of the experiment compared to MCM  
210 and *C. bolteae* ATCC BAA-613 CS treated animals (Figure 4F). Furthermore, CS from *C.*  
211 *bolteae* AHG0001 significantly reduced colonic inflammation as determined by a decreased  
212 colon weight to length ratio (Figure 4G), histology scores (Figure 4H, Supplementary Figure  
213 5A-C) and immune cell infiltration (Supplementary Figure 5E). Moreover, *Winnie* mice  
214 treated with *C. bolteae* AHG0001 demonstrated increased mucin production and goblet cell  
215 restitution in the distal and mid colon as determined by Alcian blue staining (Figure 4I,  
216 Supplementary Figure 5D); indicative of reduced endoplasmic reticulum (ER) stress and  
217 histologic healing. Consistent with reduced colitis, there was a significant reduction in colonic  
218 expression of the inflammatory genes *Il-6* and *Cxcl-10* and the ER stress markers *spliced-Xbp1*  
219 and *Grp78* in the colon (Figure 4J). Together, these results showed the feasibility of applying  
220 a precision medicine approach using *ex vivo* organoid cultures to accurately predict treatment  
221 response in colitis.

222 Finally, we hypothesised that intraspecies variations in NF- $\kappa$ B suppressive capacity, together  
223 with the influence of culture media on bioactive production, could facilitate identification of  
224 candidate bioactive encoding BGCs and/or bioactive molecules produced by *C. bolteae* using  
225 comparative genomics or metabolomics. Comparative genomic analyses revealed that *C.*  
226 *bolteae* AHG0001 carries 19 predicted BGCs of which 14 are either highly or partially  
227 conserved in *C. bolteae* ATCC BAA-613 (Figure 5A, Supplementary Figure 6A). However,  
228 as the biosynthesis of bioactives by gut bacteria may be principally driven through modest  
229 modifications of common primary metabolites<sup>35, 36</sup> we considered it likely that other BGCs  
230 would be overlooked by *in silico* screens. We consequently applied a process of bioassay  
231 guided solvent extractions and filtrations, followed by ultra-high-performance liquid  
232 chromatography quadrupole time-of-flight mass spectrometric analysis (UPLC-QTOF), and

233 comparative metabolomics, to identify the bioactive(s) (Figure 5B, Supplementary  
234 Information). These analyses successfully identified a cluster of six structurally related small  
235 molecules (Figure 5C, 5Ca, i-vi) that were uniquely present in the NF- $\kappa$ B suppressive ethyl  
236 acetate (EtOAc) extract of *C. bolteae* AHG0001, but were absent in comparable extracts of *C.*  
237 *bolteae* ATCC BAA-613, and, following semi-preparative HPLC fractionation of the *C.*  
238 *bolteae* AHG0001 EtOAc extract, were uniquely localised in the NF- $\kappa$ B suppressive fractions  
239 (Supplementary Figure 6B-C). The identification of a novel secreted molecule confirmed the  
240 benefit of using an integrated approach combining bacterial isolation, functional screens and  
241 comparative metabolomics to expedite bioactive discovery.

## 242 Discussion

243 Firmicutes affiliated bacteria are amongst the most abundant gut microbes and these taxa are  
244 widely recognised to possess immunomodulatory capacities<sup>15, 37, 38</sup>. However, they are poorly  
245 represented in culture collections and their ability to modulate immune responses remain  
246 largely undefined. In this study, we identified five gut bacterial strains affiliated with  
247 *Clostridium* clusters IV, XIVa and XV that are comparable to the well-characterised *F.*  
248 *prausnitzii* A2-165 strain in their ability to suppress NF- $\kappa$ B activation. The NF- $\kappa$ B suppressive  
249 bioactivities were characterised by significant biochemical and intraspecies variations  
250 suggesting there may be extensive functional redundancy and NF- $\kappa$ B suppressive capacity may  
251 be more prevalent than previously appreciated. This is consistent with Geva-Zatorsky *et al.*,<sup>2</sup>  
252 who determined that as few as 53 isolates were associated with over 24,000 immune  
253 phenotypes that include functionalities relevant to IBD (e.g. Treg induction). Modulating host  
254 immune responses may support the ability of gut bacteria to colonise and persist in the gut  
255 environment and the ability of the microbiota to act as an extrinsic regulator of host immunity  
256 may underpin immune homeostasis and contribute to disease risk in genetically susceptible

257 individuals.

258 IBD is characterised by a dysregulated immune response with select genetic susceptibilities  
259 affecting therapeutic responsiveness<sup>30, 31</sup>. In order to develop improved precision treatments  
260 for IBD we therefore used gut epithelial organoids and immune cells to identify bacteria  
261 capable of suppressing cytokine mediated inflammatory responses. The heat and proteinase K  
262 resilient bioactives showed strong suppression of IL-8 secretion in organoids and immune cells  
263 from healthy, CD and UC subjects. Interestingly, the putative peptide bioactives produced by  
264 *F. prausnitzii* A2-165 and *C. aldenense* AHG0011 were notably less suppressive in UC derived  
265 organoids and PBMCs, and CD organoids, when compared to organoids derived from healthy  
266 controls; this may be reflective of the increased endogenous protease activity in IBD<sup>39</sup>. Our *in*  
267 *vitro* and *ex vivo* data also suggested that functional capacity rather than phylogeny may be the  
268 key determinant of biologic effects. To explore this hypothesis, we capitalised on the *C.*  
269 *bolteae* intraspecies differences and demonstrated that a precision medicine approach could be  
270 applied to alleviate established colitis in *Winnie* mice. Notably, treatment with *C. bolteae*  
271 AHG0001 CS was associated with a rapid onset of action with improvement in diarrhoea,  
272 alleviation of inflammation and ER stress, as well as restoration of goblet cell numbers and  
273 mucin production. Mucosal and histologic healing are amongst amongst the best predictors of  
274 long-term outcomes in IBD and taken together our data suggests a precision medicine approach  
275 could be applied to microbiome based IBD treatment.

276 The NF- $\kappa$ B suppressive strains carry multiple BGCs, many of whose products remain cryptic,  
277 underlining the inherent challenges in applying genomic based approaches to map genotype  
278 with phenotype. In addition, the biosynthesis of bioactives by gut bacteria may be principally  
279 driven through modest modifications of common primary metabolites that are underpinned by  
280 small BGCs<sup>35, 40</sup>. As the medium dependent effects on NF- $\kappa$ B suppression may affect the

281 therapeutic efficacy of live biotherapeutics for IBD, we therefore used a bioassay-guided  
282 fractionation and a comparative metabolomic approach to identify a novel low molecular  
283 weight non-polar molecule that was associated with the NF- $\kappa$ B suppressive activity of *C.*  
284 *bolteae* AHG0001. Critically, this molecule was not associated with medium components  
285 suggesting the suppressive activity is unlikely to be due to the biotransformation of medium  
286 components<sup>41</sup>. Consistent with other microbial bioactives, the *C. bolteae* AHG0001 bioactive  
287 acts independently of the bacterial cell and suppresses the inflammatory response in animals.

288 In summary, our IBD guided approach provides new opportunities to rationally bioprospect  
289 the gut microbiota for precision live biotherapeutic strains and/or bioactives that could be used  
290 to expedite the development of safer and more efficacious therapeutics.

## 291 **Materials & Methods**

292 ***Bacterial strains, culture conditions and analyses.*** Firmicutes affiliated bacteria were  
293 cultured in anoxic MCM or BHI medium (Supplementary Information). *E. coli* Nissle 1917  
294 was cultured using LB medium. *L. casei* Shirota was isolated from a Yakult Original probiotic  
295 drink and cultured using anoxic de Man Rogosa Sharpe (MRS) or BHI medium. *L. rhamnosus*  
296 GG and *B. animalis* subsp. *lactis* BB-12 were isolated from a probiotic capsule and cultured  
297 using anoxic MRS or BHI medium.

298 ***Bacterial comparative analyses.*** The phylogeny of the Firmicutes isolates was inferred using  
299 the *rrs* gene sequences as described in the Supplementary Information. High molecular weight  
300 DNA was prepared and sequenced using the Illumina NextSeq 500 system (2 x 150bp High  
301 Output kit) with v2 chemistry as previously described<sup>20</sup>. The *C. bolteae* AHG0001, *C.*  
302 *citroniae* AHG0002, *C. aldenense* AHG0011 and *E. limosum* AHG0017 sequence data were  
303 assembled, assessed for contamination and completeness and ordered as described in the  
304 Supplementary Information. Genome based phylogeny was determined using the Genome  
305 Taxonomy Database (GTDB) as previously described<sup>20</sup>. Candidate BGC were identified and  
306 characterised as described in the Supplementary Information. The Whole Genome Shotgun  
307 projects for *C. bolteae* AHG0001, *C. citroniae* AHG0002, *C. aldenense* AHG0011 and *E.*  
308 *limosum* AHG0017 were deposited respectively at DDBJ/EMBL/GenBank under the  
309 accessions QYRW00000000, QYRX00000000, QYRY00000000 and QYRZ00000000. The  
310 version described in this paper are the first versions, [XXXX]01000000.

311 ***Measurement of immunomodulatory activities.*** The immunomodulatory potential of the  
312 individual strains was examined following growth in MCM, BHI or MRS. Briefly, for the first  
313 pass screen an individual colony was used to inoculate medium and the culture was grown for

314 up to 96 hours. For the confirmatory screens, the NF- $\kappa$ B suppressive capacity of biological  
315 replicate cultures produced from select strains was assessed. Briefly, two independent broth  
316 cultures were established from individual colonies of each strain (n=2 independent biological  
317 replicates per strain) and following growth as described above, each individual culture was  
318 used to inoculate 3 tubes of broth (n=6, consisting of n=2 independent biological replicates per  
319 strain with n=3 technical replicate for each biological replicate). The cultures were grown until  
320 early stationary phase and then 1.5 ml of each culture was centrifuged at 25,000 x g for 3  
321 minutes. Then, 1 ml of the cell-free supernatant fraction was collected and stored at  $\leq 30^{\circ}\text{C}$  as  
322 a single-use aliquot. The NF- $\kappa$ B suppressive capacity of the CS was assessed using the  
323 LS174T-NF-k $Bluc$  or Caco-2-NF-k $Bluc$  reporter cell assays adapted for high-throughput  
324 screening (Supplementary Information). The effects of sodium salt SCFA on NF- $\kappa$ B activation  
325 were assessed by treating the cell lines for 30 min and then determining their ability to suppress  
326 cytokine mediated NF- $\kappa$ B activation as described above. The cytotoxicity of the supernatants  
327 was assessed using the CytoTox96<sup>®</sup> Non-Radioactive Cytotoxicity Assay according to the  
328 manufacturer's instructions (Promega).

329 ***Organoid culturing and immunomodulatory assays.*** All patient samples were collected in  
330 accordance with the recommendations of the Mater Health Services Human Research Ethics  
331 Committee (HREC 2016001782 & HREC/14/MHS/125) for the Mater Inflammatory Bowel  
332 Disease Biobank. Colonic biopsies (6 x 3mm pinch biopsies) were collected from healthy  
333 (n=6), CD (n=5) and UC (n=5) patients (Supplementary Table 1). The colonic biopsies were  
334 processed and cultured as previously described (Supplementary Information). To assess the  
335 ability of the CS to suppress IL-8 secretion the organoids were seeded in a 48 well plate and  
336 grown for 48 hours. Then, organoids were treated with 10% v/v of select CS in 50% L-WRN  
337 conditioned medium and subsequently stimulated with rhIL-1 $\beta$  (50 ng.ml<sup>-1</sup>) for 24 hours before

338 quantifying IL-8 in the supernatant. Cytotoxicity was assessed using the CytoTox 96® Non-  
339 Radioactive Cytotoxicity Assay. For the animal experiments, colonic tissues from C57BL/6  
340 and *Winnie* (n=2) mice were segmented and the crypts were isolated and cultured according to  
341 previously established protocols (Supplementary Information). For the treatments, the  
342 organoids were first seeded in a 24 well plate and grown for 48 hours. The organoids were then  
343 pre-treated with 10% v/v of select CS for 30 mins and then stimulated with 50 ng/ml mIL-1 $\beta$   
344 for 6 hours. The cells were lysed and used for mRNA expression.

345 ***Peripheral Blood Mononuclear Cell (PBMC) isolation and immunomodulatory assays.***

346 Human peripheral blood was obtained for 6 healthy, CD and UC patients from the Mater  
347 Inflammatory Bowel Disease biobank. PBMCs were isolated by Ficoll gradient density  
348 centrifugation (Supplementary Information). For the treatments, 500,000 cells per well were  
349 plated on a 96-well plate and treated with 10% v/v of CS in RPMI medium for 30 minutes,  
350 followed by stimulation with rhTNF $\alpha$  (50 ng/ml). IL-8 secretion and cytotoxicity was assessed  
351 as previously described.

352 ***RNA extraction, cDNA synthesis and gene expression.*** Total RNA was prepared as

353 previously described except that LS174T and Caco-2 cells were used. The expression of *il6*,  
354 *il8* and *cxcl-10* was assessed as previously described<sup>20,21</sup>. RNAeasy mini kits (QIAGEN) were  
355 used to extract RNA from the mouse organoid cultures according to the manufacturer's  
356 instructions. RNA was reverse transcribed to cDNA using iScript cDNA synthesis kit (Bio-  
357 Rad Laboratories) and the protocol provided by the manufacturer. The C<sub>t</sub> values for each gene  
358 were normalised to untreated controls and further normalised to housekeeping gene (mouse  $\beta$ -  
359 actin) and presented as fold change. The mouse primers used are summarised in  
360 Supplementary Table 2).



361 ***Quantitative cytokine expression assays.*** To quantify IL-8 secretion, cell free supernatant was  
362 collected after 24 hours and IL-8 was quantified by ELISA according to manufacturer's  
363 instructions (BioLegend).

364 ***Animal experiments.*** All animal experiments were approved by the University of Queensland  
365 Animal Ethics Committee. *Winnie* mice were bred in-house in a pathogen-free animal facility.  
366 Male and female mice were intrarectally gavaged with 50  $\mu$ l of CS from *C. bolteae* AHG0001  
367 and ATCC BAA-613 for 14 days. MCM medium processed in the same manner as the CS was  
368 used as the vehicle control. Disease activity was assessed as described in the Supplementary  
369 Information.

370 ***GNPS Analyses.*** UHPLC-QTOF (Agilent Technologies 6545 Q-TOF LC/MS) data was  
371 acquired by subjecting aliquots of EtOAc extracts obtained from (a) cultures of *C. bolteae*  
372 AHG0001 in either MCM or BHI media, (b) cultures of *C. bolteae* BAA-613, in either MCM  
373 or BHI media, and; (c) un-inoculated MCM and BHI media (1  $\mu$ L). UHPLC conditions were  
374 as described in the Supplementary Information. The acquired MS/MS data was converted from  
375 Agilent MassHunter data file (.d) to the mzXML file format using the software MS-Convert<sup>42</sup>.  
376 Molecular networks were generated using the online Global Natural Products Social molecular  
377 networking web-platform (GNPS) (gnps.ucsd.edu). MS-Cluster with a precursor ion mass  
378 tolerance of 0.02 Da and a MS/MS fragment ion tolerance of 0.02Da were selected to create  
379 consensus spectra<sup>43</sup>. A minimum cluster size of 1, cosine score 0.7, and minimum number of  
380 fragments of 6, were selected for molecular networking. The spectral networks were imported  
381 into Cytoscape 3.5.1<sup>44</sup> and visualized using force directed layout where nodes represented  
382 parent masses.

383 ***Analytical fractionation of NF- $\kappa$ B suppressive extract.*** An EtOAc extract (3mg) of *C. bolteae*

384 AHG0001 cultivated in MCM medium was subjected to analytical HPLC (Supplementary  
385 Information) to yield 17 fractions. Each fraction was dried *in vacuo* then resuspended in MeOH  
386 (50  $\mu$ L). NF- $\kappa$ B suppressive fractions were combined and an aliquot (1  $\mu$ L) was subjected to  
387 UHPLC-QTOF analysis, with single ion extraction (SIE) same quadrupole time-of-flight  
388 spectrometer and UHPLC conditions described above. Single ion extraction ( $m/z$  molecular  
389 ion) chromatograms for molecules exclusively present in *C. bolteae* AHG0001 (i.e. i-xvi in  
390 GNPS analysis Figure 5C), using Agilent MassHunter Qualitative Analysis software,  
391 confirmed that only i-vi were present in the NF- $\kappa$ B suppressive fraction.

392 **Statistical analyses.** The NF- $\kappa$ B suppressive effects of the suppressive strains was assessed  
393 using biological duplicates with each duplicate comprising of three technical replicates.  
394 Significance was determined using a one-way ANOVA with correction for multiple  
395 comparisons with a Dunnett test. Differences were considered significant at  $p \leq 0.05$ . A heat  
396 map of the first pass screen data was produced using GraphPad Prism (version 7.0) and the  
397 Heatmap tool at the HIV sequence database  
398 (<https://www.hiv.lanl.gov/content/sequence/HEATMAP/heatmap.html>). The animal  
399 experiments were performed twice independently, and the data combined for analysis. The  
400 D'Agostino-Pearson omnibus test was used to verify the normal distribution of all data.  
401 Significance was determined using t-tests, one-way ANOVA with multiple comparisons  
402 (Sidak), two-way ANOVA corrected for multiple comparisons with a Dunnett test using  
403 GraphPad Prism (version 7.0). Differences were considered significant at  $p \leq 0.05$ .

#### 404 **Acknowledgements**

405 This research was supported via funds provided by the University of Queensland (UQ) Faculty  
406 of Medicine (MM, JB and PÓC) and Diamantina Institute (MM). We gratefully acknowledge

407 the support provided by the UQ Research Training Program and Mater Frank Clair Scholarship  
408 (RG), UQ Institute for Molecular Bioscience (KS and RKC) and UQ Reginald Ferguson  
409 Fellowship in Gastroenterology (PÓC). The Translational Research Institute is supported by a  
410 grant from the Australian Government.

#### 411 **Author Contributions**

412 PÓC and JB conceived the study and developed it with MMcG and MM; PÓC and RG prepared  
413 samples for analysis and performed the immunomodulatory characterizations; RG and JB  
414 performed the organoid, PBMC and animal experiments; ECH and PÓC performed the  
415 genomic analyses; KS and RJC performed the metabolomics and molecule analyses; RG, ECH,  
416 KS, MMcG, MM, RJC JB and PÓC analysed the data, and; PÓC wrote the manuscript with  
417 RG, ECH, KS, MMcG, MM, RJC and JB.

#### 418 **Competing Interest**

419 The authors declare no competing interest.

420

## 421 References

- 422 1. Peterson, L.W. & Artis, D. Intestinal epithelial cells: regulators of barrier function and  
423 immune homeostasis. *Nature Reviews Immunology* 14, 141 (2014).
- 424 2. Geva-Zatorsky, N. et al. Mining the human gut microbiota for immunomodulatory  
425 organisms. *Cell* 168, 928-943.e911 (2017).
- 426 3. Kabat, A.M., Srinivasan, N. & Maloy, K.J. Modulation of immune development and  
427 function by intestinal microbiota. *Trends Immunol.* 35, 507-517 (2014).
- 428 4. Mazmanian, S.K., Round, J.L. & Kasper, D.L. A microbial symbiosis factor prevents  
429 intestinal inflammatory disease. *Nature* 453, 620-625 (2008).
- 430 5. Wlodarska, M. et al. Indoleacrylic acid produced by commensal *Peptostreptococcus*  
431 species suppresses inflammation. *Cell Host Microbe* 22, 25-37.e26 (2017).
- 432 6. Wullaert, A., Bonnet, M.C. & Pasparakis, M. NF- $\kappa$ B in the regulation of epithelial  
433 homeostasis and inflammation. *Cell Res.* 21, 146-158 (2011).
- 434 7. Renner, F. & Schmitz, M.L. Autoregulatory feedback loops terminating the NF-  
435 kappaB response. *Trends Biochem. Sci.* 34, 128-135 (2009).
- 436 8. Zaidi, D. & Wine, E. Regulation of nuclear factor kappa-light-chain-enhancer of  
437 activated B Cells (NF- $\kappa$ B) in inflammatory bowel diseases. *Frontiers in Pediatrics* 6  
438 (2018).
- 439 9. Han, Y.M. et al. NF-kappa B activation correlates with disease phenotype in Crohn's  
440 disease. *PLoS One* 12, e0182071 (2017).
- 441 10. Rogler, G. et al. Nuclear factor kappaB is activated in macrophages and epithelial  
442 cells of inflamed intestinal mucosa. *Gastroenterology* 115, 357-369 (1998).
- 443 11. Gevers, D. et al. The treatment-naïve microbiome in new-onset Crohn's disease. *Cell*  
444 *Host & Microbe* 15, 382-392 (2014).
- 445 12. Franzosa, E.A. et al. Gut microbiome structure and metabolic activity in inflammatory  
446 bowel disease. *Nat Microbiol* 4, 293-305 (2019).
- 447 13. Costello, S.P. et al. Systematic review with meta-analysis: faecal microbiota  
448 transplantation for the induction of remission for active ulcerative colitis. *Aliment.*  
449 *Pharmacol. Ther.* 46, 213-224 (2017).
- 450 14. Wilson, B.C., Vatanen, T., Cutfield, W.S. & O'Sullivan, J.M. The super-donor  
451 phenomenon in fecal microbiota transplantation. *Frontiers in cellular and infection*  
452 *microbiology* 9, 2-2 (2019).
- 453 15. Sokol, H. et al. *Faecalibacterium prausnitzii* is an anti-inflammatory commensal  
454 bacterium identified by gut microbiota analysis of Crohn disease patients. *Proc. Natl.*  
455 *Acad. Sci. U. S. A.* 105, 16731-16736 (2008).
- 456 16. Eeckhaut, V. et al. *Butyricicoccus pullicaecorum* in inflammatory bowel disease. *Gut*  
457 62, 1745-1752 (2012).
- 458 17. Takeshita, K. et al. A single species of *Clostridium* subcluster XIVa decreased in  
459 ulcerative colitis patients. *Inflamm. Bowel Dis.* 22, 2802-2810 (2016).
- 460 18. Quevrain, E. et al. Identification of an anti-inflammatory protein from  
461 *Faecalibacterium prausnitzii*, a commensal bacterium deficient in Crohn's disease.  
462 *Gut* 65, 415-425 (2016).
- 463 19. Ó Cuív, P. et al. Isolation of genetically tractable most-wanted bacteria by  
464 metaparental mating. *Sci. Rep.* 5, 13282 (2015).
- 465 20. Ó Cuív, P. et al. *Enterococcus faecalis* AHG0090 is a genetically tractable bacterium  
466 and produces a secreted peptidic bioactive that suppresses nuclear factor kappa B  
467 activation in human gut epithelial cells. *Front. Immunol.* 9 (2018).

- 468 21. Ó Cuív, P. et al. The gut bacterium and pathobiont *Bacteroides vulgatus* activates NF-  
469 kappaB in a human gut epithelial cell line in a strain and growth phase dependent  
470 manner. *Anaerobe* 47, 209-217 (2017).
- 471 22. Lakhdari, O. et al. Identification of NF-κB modulation capabilities within human  
472 intestinal commensal bacteria. *Journal of Biomedicine and Biotechnology* 2011  
473 (2011).
- 474 23. Ghoshal, U.C. et al. The role of the microbiome and the use of probiotics in  
475 gastrointestinal disorders in adults in the Asia-Pacific region - background and  
476 recommendations of a regional consensus meeting. *J. Gastroenterol. Hepatol.* 33, 57-  
477 69 (2018).
- 478 24. Bousvaros, A. et al. A randomized, double-blind trial of *Lactobacillus* GG versus  
479 placebo in addition to standard maintenance therapy for children with Crohn's disease.  
480 *Inflamm. Bowel Dis.* 11, 833-839 (2005).
- 481 25. Prantera, C., Scribano, M.L., Falasco, G., Andreoli, A. & Luzi, C. Ineffectiveness of  
482 probiotics in preventing recurrence after curative resection for Crohn's disease: a  
483 randomised controlled trial with *Lactobacillus* GG. *Gut* 51, 405-409 (2002).
- 484 26. Petersen, A.M. et al. Ciprofloxacin and probiotic *Escherichia coli* Nissle add-on  
485 treatment in active ulcerative colitis: a double-blind randomized placebo controlled  
486 clinical trial. *J Crohns Colitis* 8, 1498-1505 (2014).
- 487 27. Wildt, S., Nordgaard, I., Hansen, U., Brockmann, E. & Rumessen, J.J. A randomised  
488 double-blind placebo-controlled trial with *Lactobacillus acidophilus* La-5 and  
489 *Bifidobacterium animalis* subsp. *lactis* BB-12 for maintenance of remission in  
490 ulcerative colitis. *J Crohns Colitis* 5, 115-121 (2011).
- 491 28. Kaci, G. et al. Inhibition of the NF-kappaB pathway in human intestinal epithelial  
492 cells by commensal *Streptococcus salivarius*. *Appl. Environ. Microbiol.* 77, 4681-  
493 4684 (2011).
- 494 29. Martín, R. et al. Functional characterization of novel *Faecalibacterium prausnitzii*  
495 strains isolated from healthy volunteers: A step forward in the use of *F. prausnitzii* as  
496 a next-generation probiotic. *Front. Microbiol.* 8 (2017).
- 497 30. Niess, J.H. et al. NOD2 polymorphism predicts response to treatment in Crohn's  
498 disease - first steps to a personalized therapy. *Dig. Dis. Sci.* 57, 879-886 (2012).
- 499 31. Barber, G.E. et al. Genetic markers predict primary non-response and durable  
500 response to anti-TNF biologic therapies in Crohn's disease. *Am. J. Gastroenterol.* 111,  
501 1816-1822 (2016).
- 502 32. Oancea, I. et al. Colonic microbiota can promote rapid local improvement of murine  
503 colitis by thioguanine independently of T lymphocytes and host metabolism. *Gut* 66,  
504 59-69 (2017).
- 505 33. Das, I. et al. Glucocorticoids alleviate intestinal ER stress by enhancing protein  
506 folding and degradation of misfolded proteins. *J. Exp. Med.* 210, 1201-1216 (2013).
- 507 34. Wang, R. et al. Neutralizing IL-23 is superior to blocking IL-17 in suppressing  
508 intestinal inflammation in a spontaneous murine colitis model. *Inflamm. Bowel Dis.*  
509 21, 973-984 (2015).
- 510 35. Cohen, L.J. et al. Commensal bacteria make GPCR ligands that mimic human  
511 signalling molecules. *Nature* 549, 48-53 (2017).
- 512 36. Colosimo, D.A. et al. Mapping interactions of microbial metabolites with human G-  
513 protein-coupled receptors. *Cell Host & Microbe* 26, 273-282.e277 (2019).
- 514 37. Atarashi, K. et al. Treg induction by a rationally selected mixture of Clostridia strains  
515 from the human microbiota. *Nature* 500, 232-236 (2013).
- 516 38. Atarashi, K. et al. Induction of colonic regulatory T cells by indigenous *Clostridium*

- 517 species. *Science* 331, 337-341 (2011).  
518 39. Vergnolle, N. Protease inhibition as new therapeutic strategy for GI diseases. *Gut* 65,  
519 1215-1224 (2016).  
520 40. Cohen, L.J. et al. Functional metagenomic discovery of bacterial effectors in the  
521 human microbiome and isolation of commendamide, a GPCR G2A/132 agonist. *Proc.*  
522 *Natl. Acad. Sci. U. S. A.* 112, E4825-4834 (2015).  
523 41. Theilmann, M.C. et al. *Lactobacillus acidophilus* metabolizes dietary plant glucosides  
524 and externalizes their bioactive phytochemicals. *MBio* 8 (2017).  
525 42. Kessner, D., Chambers, M., Burke, R., Agus, D. & Mallick, P. ProteoWizard: open  
526 source software for rapid proteomics tools development. *Bioinformatics* 24, 2534-  
527 2536 (2008).  
528 43. Frank, A.M. et al. Clustering millions of tandem mass spectra. *J. Proteome Res.* 7,  
529 113-122 (2008).  
530 44. Shannon, P. et al. Cytoscape: a software environment for integrated models of  
531 biomolecular interaction networks. *Genome Res.* 13, 2498-2504 (2003).  
532

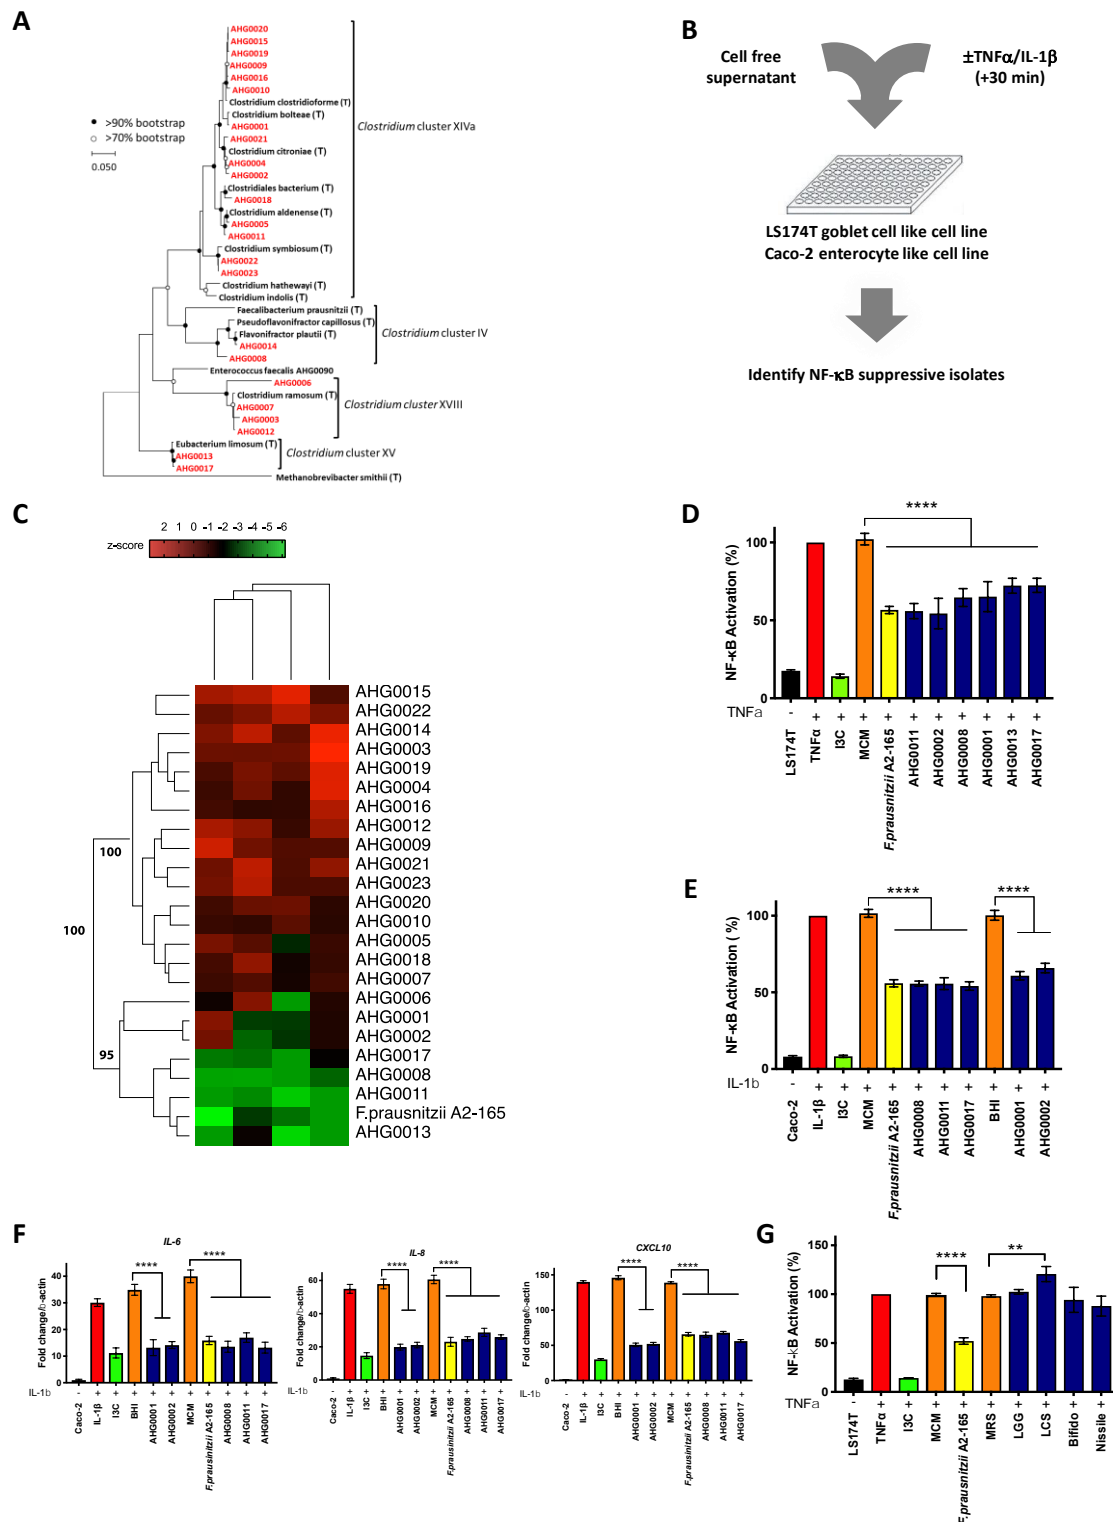

533

534 **Figure 1A.** 16S rRNA based phylogeny of the MPM isolates characterised in this study (red  
 535 typeface) and representative microbial isolates and reference sequences (bold black typeface).

536 **B.** An overview of the experimental approach to characterising the NF  $\kappa$ B suppressive capacity



537 of the bacteria examined in this study. Cell free CS was added to the reporter cell lines which  
538 were then stimulated with cytokine after 30 min. Luciferase activity was assayed after 4 hours.  
539 **C.** Heat map analysis of the NF- $\kappa$ B suppressive capacity of the bacterial isolates. The ability  
540 of CS prepared from bacterial isolates grown in MCM or BHI to suppress NF- $\kappa$ B in LS174T  
541 or Caco-2 reporter cell lines was assessed twice independently. A Z-factor of  $0.805 \pm 0.06$   
542 (MCM) and  $0.87 \pm 0.01$  (BHI) was achieved for the LS174T cells while a Z-factor of  $0.78 \pm$   
543  $0.057$  (MCM) and  $0.765 \pm 0.02$  (BHI) was achieved for the Caco-2 cells. A subset of strains  
544 formed an NF- $\kappa$ B suppressive cluster with *F. prausnitzii* A2-165. **D.** LS174T based  
545 confirmatory assay of the hits identified from the first pass screen. NF- $\kappa$ B activation was  
546 assessed 4 h after TNF $\alpha$  stimulation and the extent of suppression was assessed against sterile  
547 medium (mean (standard deviation (SD))). **E.** Caco-2 based confirmatory assay of the hits  
548 identified from the first pass screen. NF- $\kappa$ B activation was assessed 4 h after IL-1 $\beta$  stimulation  
549 and the extent of suppression was assessed against sterile medium (mean (SD)). **F.** Caco-2  
550 based qRT-PCR confirmatory assay of the hits identified from the first pass screen (mean  
551 (SD)). *F. prausnitzii* A2-165 and the validated hits suppress IL-1 $\beta$  induced *cxcl10*, *il6* and *il8*  
552 expression in Caco-2 cells. **G.** Analysis of the ability of *L. rhamnosus* GG (LGG), *L. casei*  
553 Shirota (LCS), *E. coli* Nissle 1917 (Nissle) and *B. animalis* subsp. *lactis* BB-12 (Bifido) to  
554 suppress TNF $\alpha$  mediated activation of NF- $\kappa$ B in LS174T cells. Cell free CS prepared from  
555 these probiotic strains do not suppress NF- $\kappa$ B activation in the LS174T cell line (mean (SD)).  
556 \*\*  $p < 0.01$ , \*\*\*\*  $p < 0.0001$  as determined by one-way ANOVA with Dunnett's multiple  
557 comparison test.



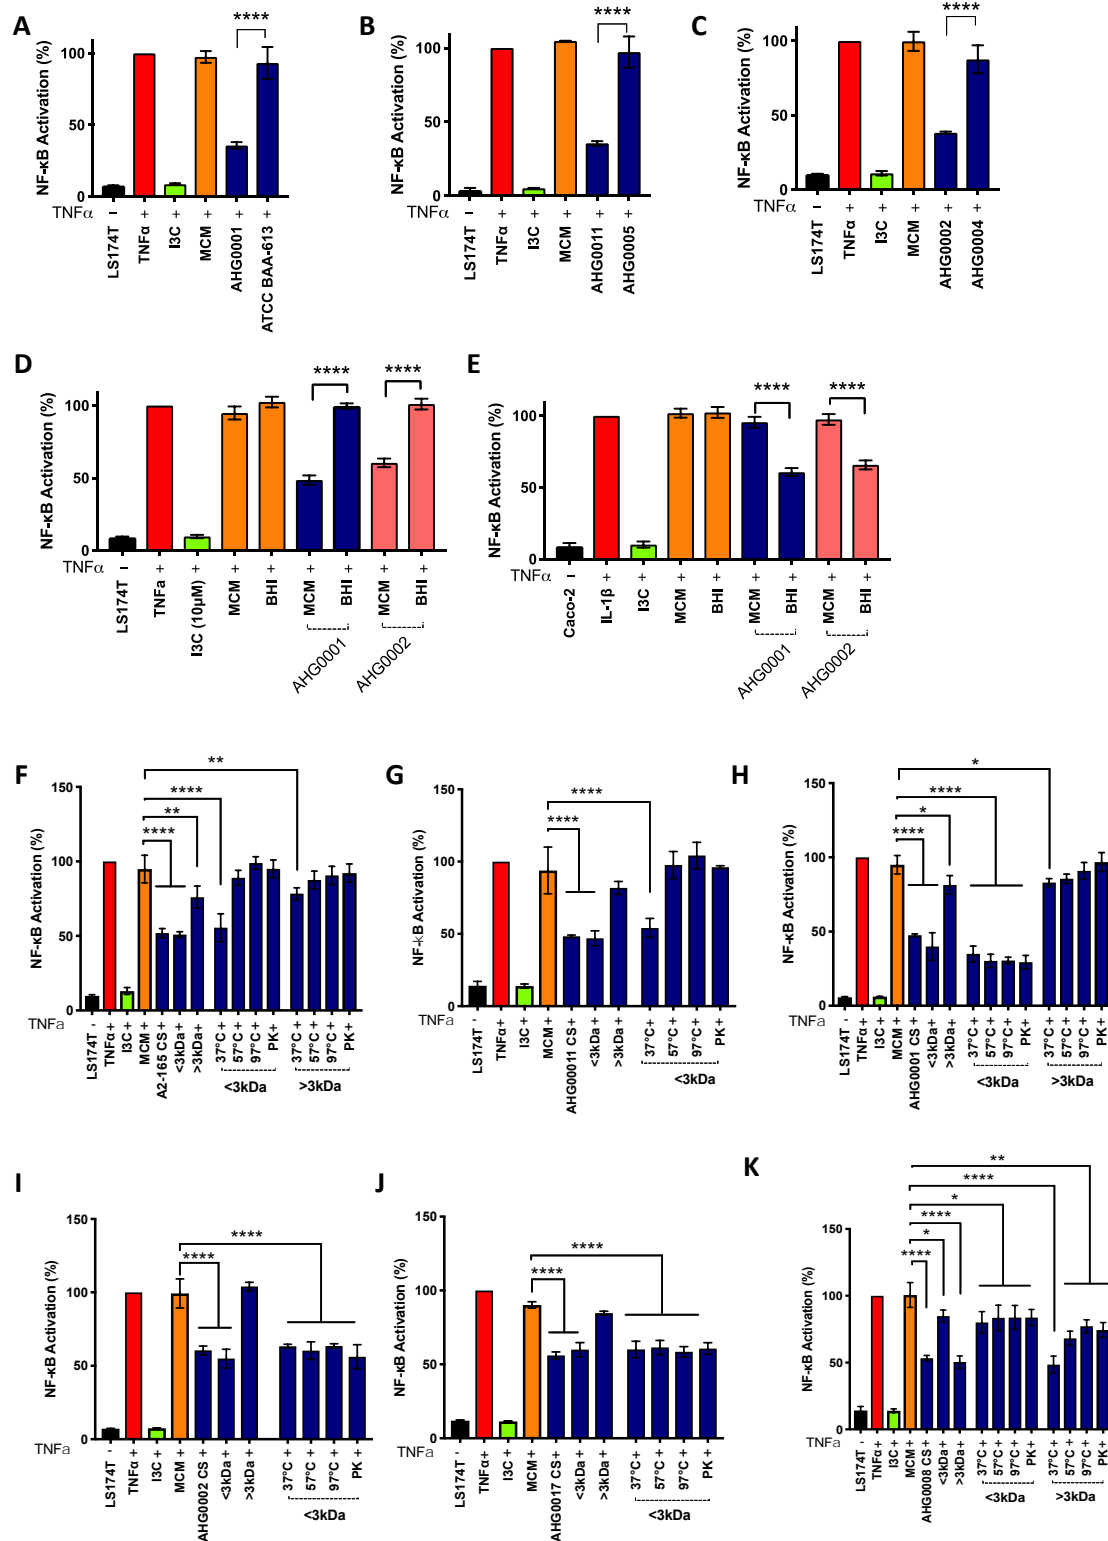

558

559 **Figure 2A-C.** Characterisation of intraspecies variation in NF-κB suppressive capacity. The

560 ability of *C. bolteae* AHG0001 and ATCC BAA-613 (Panel A), *C. citroniae* AHG0002 and

561 AHG0004 (Panel B) and *C. aldenense* AHG0011 and AHG0005 (Panel C) to suppress NF- $\kappa$ B  
562 was analysed using the LS174T reporter cells. NF- $\kappa$ B activation was assessed 4 h after TNF $\alpha$   
563 stimulation and the extent of suppression was assessed against sterile medium (mean (SD)).  
564 **D-E.** Characterisation of the effect of growth medium on the NF- $\kappa$ B suppressive capacity of  
565 *C. bolteae* AHG0001 and *C. citroniae* AHG0002 in LS174T (Panel D) and Caco-2 (Panel E)  
566 reporter cell lines. NF- $\kappa$ B activation was assessed 4 h after cytokine stimulation and the extent  
567 of suppression was assessed against sterile medium. **F-K.** Characterisation of the bioactive  
568 factors produced by *F. prausnitzii* A2-165 (Panel F), *C. aldenense* AHG0011 (Panel G), *C.*  
569 *bolteae* AHG0001 (Panel H), *C. citroniae* AHG0002 (Panel I), *E. limosum* AHG0017 (Panel  
570 J) and *Pseudoflavonifractor* sp. AHG0008 (Panel K). The cell free CS were untreated or  
571 subjected to size fractionation, heat and/or proteinase K treatments as appropriate. NF- $\kappa$ B  
572 activation was assessed 4 h after TNF $\alpha$  stimulation and the extent of suppression was assessed  
573 against sterile medium (mean (SD)). \*  $p < 0.05$ , \*\*  $p < 0.01$ , \*\*\*  $p < 0.001$ , \*\*\*\*  $p < 0.0001$  as  
574 determined by one-way ANOVA with Dunnett's multiple comparison test.

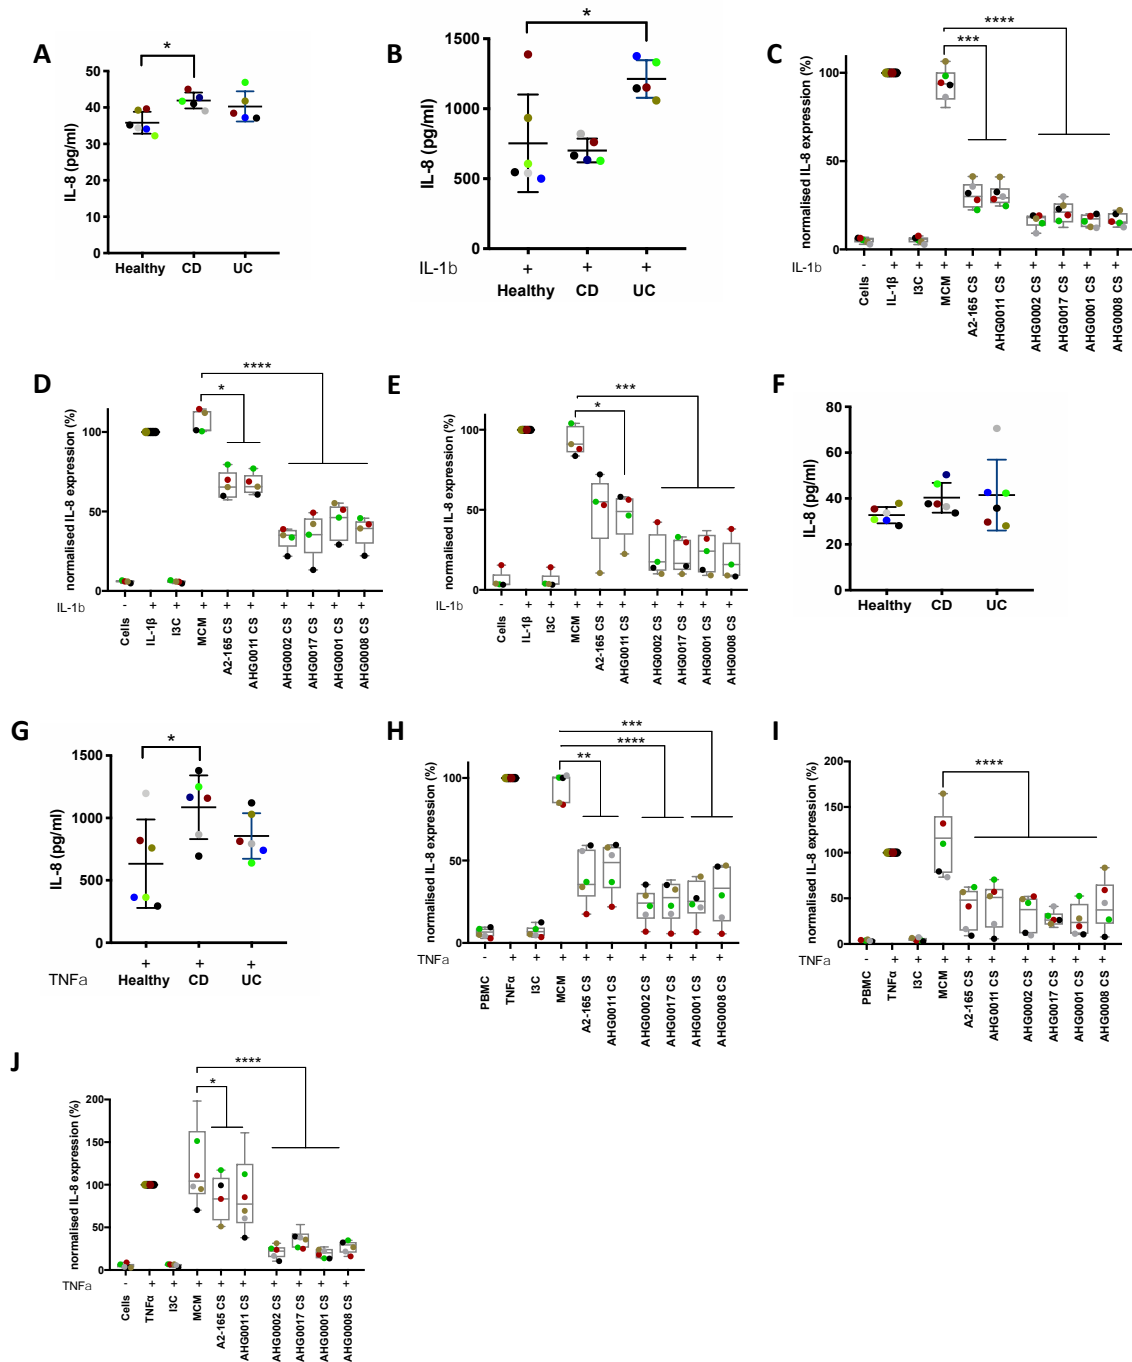

575

576 **Figure 3A-B.** Analysis of basal IL-8 secretion by healthy, CD and UC derived gut epithelial

577 organoids (Panel A) and following IL-1 $\beta$  stimulation (Panel B). IL-8 secretion was assessed

578 24 h after cytokine stimulation (mean (SD)). **C-E.** Analysis of the ability of *F. prausnitzii* A2-

579 165, *C. aldenense* AHG0011, *C. citroniae* AHG0002, *E. limosum* AHG0017, *C. bolteae*

580 AHG0001 and *Pseudoflavonifractor* sp. AHG0008 to suppress IL-8 secretion in healthy (Panel

581 C), CD (Panel D) and UC (Panel E) subject derived gut epithelial organoids. IL-8 secretion  
582 was assessed 24 h after cytokine stimulation and compared against the sterile medium (mean  
583 (SD)). **F-G.** Analysis of basal IL-8 secretion by healthy, CD and UC derived PBMCs (Panel  
584 F) and following TNF $\alpha$  stimulation (Panel G). **H-J.** Analysis of the ability of *F. prausnitzii*  
585 A2-165, *C. aldenense* AHG0011, *C. citroniae* AHG0002, *E. limosum* AHG0017, *C. bolteae*  
586 AHG0001 and *Pseudoflavonifractor* sp. AHG0008 to suppress IL-8 secretion in healthy (Panel  
587 H), CD (Panel I) and UC (Panel J) subject derived PBMCs. IL-8 secretion was assessed 24 h  
588 after cytokine stimulation and compared against the sterile medium (mean (SD)). \*  $p < 0.05$ , \*\*  
589  $p < 0.01$ , \*\*\*  $p < 0.001$ , \*\*\*\*  $p < 0.0001$  as determined by one-way ANOVA with Dunnett's  
590 multiple comparison test.

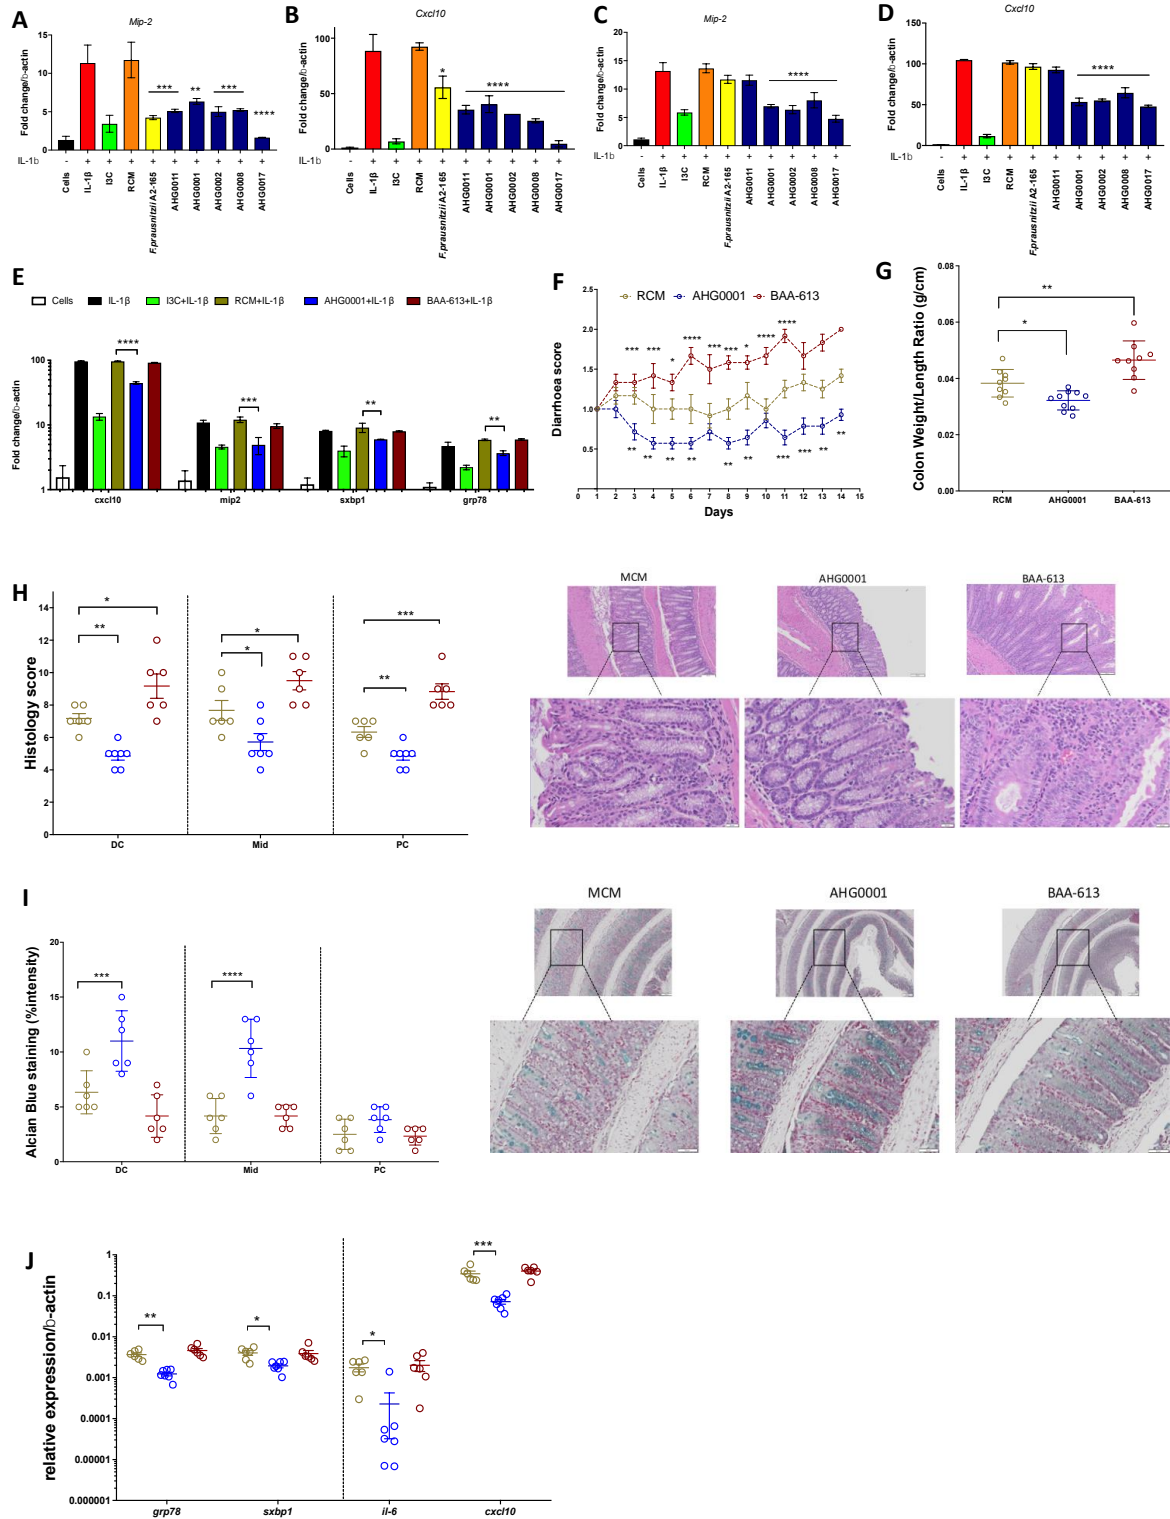

591

592 **Figure 4A-D.** Effects of bioactives on pro-inflammatory gene expression using murine derived

593 organoids from C57/BL6 (Panels A-B) and Winnie (Panels C-D) mice. Murine derived

594 organoids were treated with CS for 30mins and then stimulated as appropriate with mIL-1 $\beta$  for

595 6 hours. **E.** *Winnie* organoid based qRT-PCR quantification of *cxcl10*, *mip-2*, *sxbp1* and *grp78*  
596 expression following treatment with *C. bolteae* AHG0001 or *C. bolteae* BAA-613. **F.** Effect  
597 of daily administration of MCM, *C. bolteae* AHG0001 CS or *C. bolteae* BAA-613 CS on  
598 diarrhoea score. **G.** Changes in colon weight/length ratio following treatment with MCM, *C.*  
599 *bolteae* AHG0001 CS or *C. bolteae* BAA-613 CS. **H.** Blinded histology scores following  
600 treatment with MCM, *C. bolteae* AHG0001 CS or *C. bolteae* BAA-613 CS. **I.** Alcian blue  
601 quantification of mucin production in *Winnie* derived colon sections with representative images  
602 from distal colon. **J.** Relative gene expression of ER stress markers (*grp78* and *sxbp1*) and  
603 pro-inflammatory (*il-6*, *cxcl10*) genes in colonic tissue sections as analysed by qRT-PCR. ns  
604 not significant, \*  $p<0.05$ , \*\*  $p<0.01$ , \*\*\*  $p<0.001$ , \*\*\*\*  $p<0.0001$ . The significance for  
605 diarrhoea was determined by comparison with MCM using one-way ANOVA with Dunnett's  
606 multiple comparison test. Sidak's multiple comparison tests were used for Figures E-J.

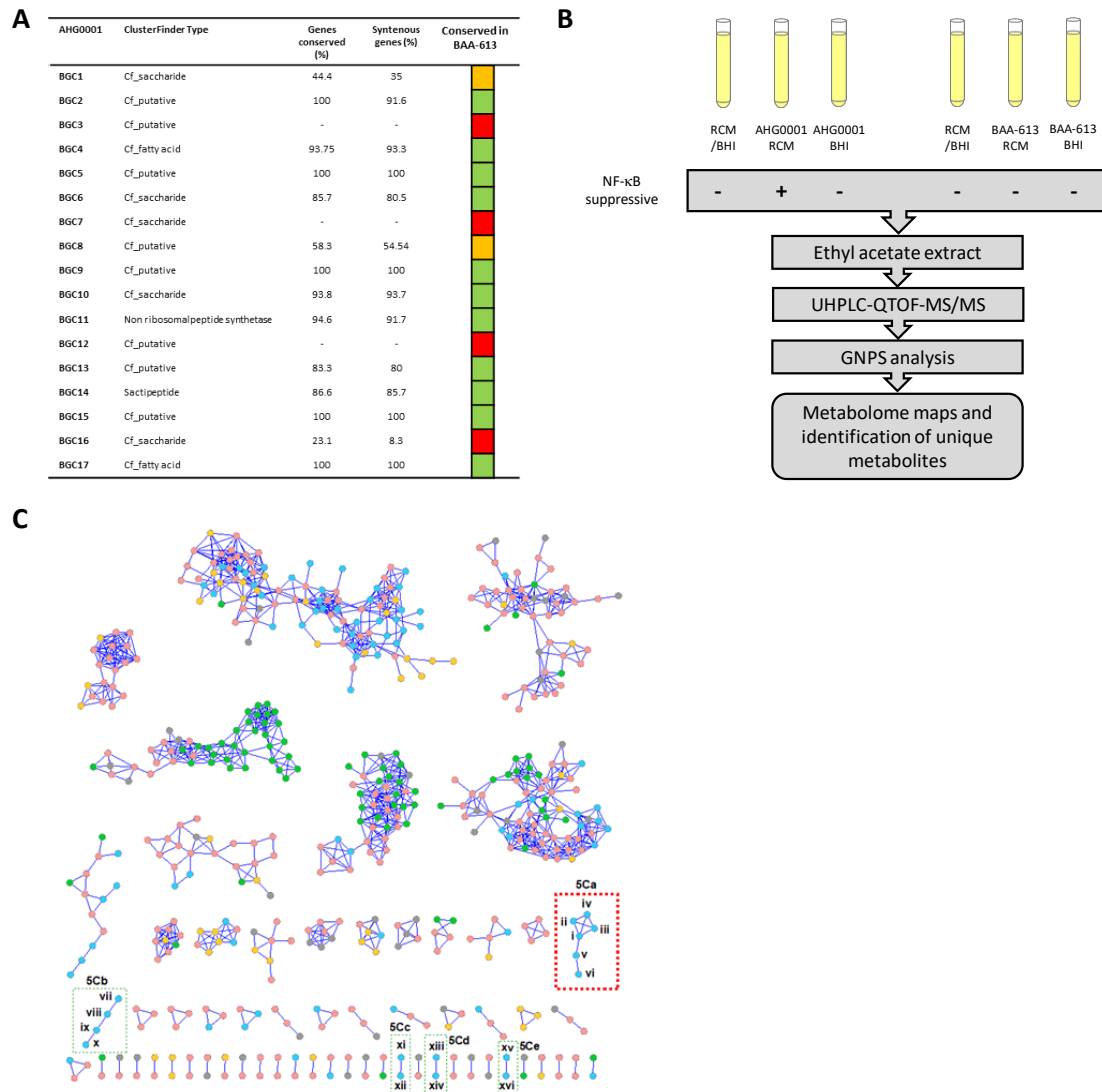

607

608 **Figure 5A.** Determination of the extent of *C. bolteae* AHG0001 BGC conservation in *C.*  
609 *bolteae* ATCC BAA-613. The extent of protein (Genes conserved) and syntenic gene pair  
610 (Syntenous pairs) conservation was assessed. *C. bolteae* AHG0001 BGC were classed as being  
611 conserved (green), partially conserved (orange) or not conserved (red). **B.** An overview of the  
612 experimental approach used to identify bioactives associated with the NF  $\kappa$ B suppressive  
613 activity of *C. bolteae* AHG0001. The presence of the bioactive in the various extractions and  
614 filtrates was determined using the LS174T reporter cell assay. **C.** Molecular networking for  
615 EtOAc extracts of *C. bolteae* AHG0001 cultured in MCM (blue nodes) and BHI media (green

**616** nodes); yellow and grey nodes represent compounds from MCM and BHI media only  
**617** respectively; pink nodes represent compounds common to MCM and BHI extracts or MCM  
**618** and BHI media. Boxes 5Ca, 5Cb, 5Cc, 5Cd and 5Ce highlight structurally related small  
**619** molecules clusters (i-vi, vii-x, xi-xii, xiii-xiv and xv-xvi respectively), that are unique to the  
**620** NF- $\kappa$ B suppressive EtOAc extracts of *C. bolteae* AHG0001 cultured in MCM media. Only  
**621** the molecules within the 5Ca cluster (red dashed box) are present in semi-preparative HPLC  
**622** fractions that exhibit NF- $\kappa$ B suppressive activity.



**Table 1.**

| <b>Genome designation</b>      | <b>CheckM marker lineage (Order (GTDB Branch))</b> | <b>Number of contigs</b> | <b>Genome size (bp)</b> | <b>GC (%)</b> | <b>CheckM completeness (%)</b> | <b>CheckM contamination (%)</b> | <b>Number of BGC</b> | <b>NCBI accession number</b> |
|--------------------------------|----------------------------------------------------|--------------------------|-------------------------|---------------|--------------------------------|---------------------------------|----------------------|------------------------------|
| <i>C. bolteae</i><br>AHG0001   | Clostridiales (UID1342)                            | 96                       | 5,985,600               | 49.4          | 98.76                          | 0.56                            | 19                   | QYRW00000000                 |
| <i>C. citroniae</i><br>AHG0002 | Clostridiales (UID1226)                            | 149                      | 6,630,634               | 48.8          | 99.37                          | 0                               | 25                   | QYRX00000000                 |
| <i>C. aldenense</i><br>AHG0011 | Clostridiales (UID1226)                            | 263                      | 6,734,822               | 49.5          | 99.37                          | 0                               | 24                   | QYRY00000000                 |
| <i>E. limosum</i><br>AHG0017   | Clostridiales (UID1120)                            | 86                       | 4,704,612               | 47.2          | 99.3                           | 0.7                             | 31                   | QYRZ00000000                 |

## Supplementary Results

**Bioactive identification.** Based on the strain and medium effects on *C. bolteae* NF- $\kappa$ B suppressive activity we applied a comparative metabolomics approach to identify the bioactive. During purification we noted that direct filtering of CS through a 0.42  $\mu$ m nylon filter resulted in a loss of NF- $\kappa$ B suppressive activity, suggestive of either low water solubility and/or a non-polar bioactive(s). By contrast, an ethyl acetate (EtOAc) extract derived from the same CS was readily filtered, with the filtrate retaining NF- $\kappa$ B suppressive activity. As a next step in the chemical characterisation, EtOAc extracts were prepared from *C. bolteae* AHG0001 and *C. bolteae* BAA-613 following growth in MCM and BHI along with EtOAc extracts from both un-inoculated MCM and BHI media. Each extract was individually subjected to ultra-high-performance liquid chromatography quadrupole time-of-flight mass spectrometric analysis with MS/MS monitoring (UPLC-QTOF-MS/MS), followed by global natural products social molecular networking (GNPS) analysis (Figure 5B), to generate a metabolome map with media controls. These analyses revealed multiple clusters of metabolites that appeared unique to the NF- $\kappa$ B suppressive MCM CS extract however only a single cluster of 6 novel and previously unreported metabolites (i-vi) was not co-clustered with compounds present in culture media, or the non-suppressive BHI CS extract. To confirm whether metabolites i-vi were the target bioactives, a portion of the NF- $\kappa$ B suppressive EtOAc extract was subjected to fractionation through a reversed-phase analytical HPLC column, with timed collection of 14 fractions. Significantly, NF- $\kappa$ B suppressive activity was localised in the non-polar fractions #13 and #14, which UPLC-QTOF analysis using single ion extraction (SIE) monitoring confirmed to co-localise with metabolites i-vi. By contrast, UPLC-QTOF-SIE analysis of other compounds present in media-associated clusters (Figure 5B), revealed they did not uniquely co-localise into the active fractions.

## Supplementary Methods & Materials

**Bacterial strains, culture conditions and analyses.** Anaerobic Firmicutes affiliated bacteria were cultured in anoxic MCM (Lab-Lemco 10 g.L<sup>-1</sup>, Peptone P 10 g.L<sup>-1</sup>, Yeast extract 3 g.L<sup>-1</sup>, Glucose 5 g.L<sup>-1</sup>, Starch 2 g.L<sup>-1</sup>, Sodium chloride 5 g.L<sup>-1</sup>, Sodium bicarbonate 15 g.L<sup>-1</sup>, Resazurin 1 mg.L<sup>-1</sup>, Cysteine-HCl 1 g.L<sup>-1</sup>) or BHI supplemented with salt solutions 2 and 3<sup>1</sup>. *F. prausnitzii* A2-165 was grown as previously described<sup>2</sup>. A Coy vinyl anaerobic chamber with an anoxic atmosphere (85% N<sub>2</sub>:10% CO<sub>2</sub>:5% H<sub>2</sub>) was used to process the anaerobic Firmicutes cultures. Bacterial cultures were incubated at 37°C for up to 48 hours. Bacterial growth was measured by spectrophotometry (OD<sub>600nm</sub>) using a SPECTRONIC 20D+ Spectrophotometer (ThermoFisher, Sydney).

**Bacterial comparative analyses.** Phylogenetic trees were constructed by aligning the 16S rRNA gene sequences using the SILVA database<sup>3</sup> and the alignment was then imported into MEGAX<sup>4</sup>. The alignment was refined, and a maximum-likelihood phylogenetic tree constructed displaying the isolate and select reference sequences. The stability of the maximum-likelihood tree was evaluated by 1000 bootstrap replications and Kimura 2-parameter modelling. Where necessary, select isolates were subject to whole cell protein profiling to determine intraspecies variations<sup>5,6</sup>. High molecular weight DNA was prepared as previously described<sup>7</sup>. The SPAdes assembler v 3.11.0 was used to quality check, filter and then *de novo* assemble the sequence data<sup>8</sup>. CheckM<sup>9</sup> was used to evaluate the genome sequencing quality by estimating the completeness and contamination based on the phylogenetic assignment of a broad set of marker genes. The *C. bolteae* AHG0001, *C. citroniae* AHG0002, *C. aldenense* AHG0011 and *E. limosum* AHG0017 contigs were ordered using Mauve<sup>10</sup> with the *C. bolteae* ATCC BAA-613, *C. citroniae* WAL-17108, Clostridiales bacterium 1\_7\_47FAA and *E. limosum* ATCC 8486 genome sequences respectively as

references. Genome based phylogeny was determined using GTDB<sup>11</sup> as previously described<sup>2</sup>. Candidate BGC were identified using the antiSMASH webserver<sup>12</sup> with the ClusterFinder Detection Strictness settings set to “loose” and the Extra Features turned on. Similar candidate BGC were identified in select genomes or the Genbank Database using MultiGeneBlast<sup>13</sup> in homology search mode. BGCs were considered highly conserved if (i)  $\geq 80\%$  of the genes in an *C. bolteae* AHG0001 BGC were conserved in *C. bolteae* ATCC BAA-613, with genes defined as being conserved if the query exhibited  $\geq 80\%$  sequence identity over  $\geq 80\%$  of the query length, and; (ii)  $\geq 70\%$  of the potential syntenic genes in a *C. bolteae* AHG0001 BGC were conserved in a *C. bolteae* ATCC BAA-613 BGC (calculated as  $((\text{MultiGeneBlast Total score} - \text{No. of Blast hits})/0.5)/(\text{No. of syntenic genes in } C. \text{ bolteae AHG0001 BGC})$ ). BGC were considered partially conserved if  $\geq 40\%$  of both the genes and potential syntenic genes were conserved.

**Measurement of immunomodulatory activities.** The LS174T-NF- $\kappa$ B<sub>luc</sub> or Caco-2-NF- $\kappa$ B<sub>luc</sub> reporter cell lines were adapted for high-throughput screening using the criterion defined by Zhang *et al.*,<sup>14</sup> where a Z-factor  $\geq 0.5$  represents an excellent assay, thereby providing a sensitive and specific approach to assess the NF- $\kappa$ B suppressive capacity of the isolates. The Z-factor for each assay was determined and only assays achieving a Z-factor  $\geq 0.5$  were processed for further analysis. The high-throughput assays were performed in 96-well microtiter plates as previously described<sup>2</sup> except that the LS174T reporter cells were stimulated with  $50 \text{ ng.ml}^{-1}$  TNF $\alpha$  and the Caco-2 cell lines were treated with 7.5% v/v CS in complete DMEM medium. NF- $\kappa$ B driven luciferase expression was assessed using the Pierce<sup>TM</sup> Firefly Luc One-Step Glow Assay Kit (ThermoFisher Scientific) according to the manufacturer’s instructions. The NF- $\kappa$ B suppressive isolates were scored and ranked on their Z-score<sup>15, 16</sup>.

**Organoid culturing and immunomodulatory assays.** The colonic biopsies were processed

and cultured as previously described<sup>17</sup>. Briefly, the biopsies were washed with PBS and digested with collagenase type I (2 mg.ml<sup>-1</sup>) supplemented with gentamicin (50 µg.ml<sup>-1</sup>) for 15-20 minutes at 37°C. The isolated crypts were washed with DMEM/F12 medium and centrifuged at 50 x g for 5 mins at 4°C. The pellets were then suspended in Basement Membrane Extract (BME, Invitrogen) in a 1:1 ratio. Then, 20µl of the mixture was plated in a 24 well tissue culture plate and cultured in 50% L-WRN conditioned medium. The crypts were expanded by serial culture until sufficient numbers were obtained for experimentation. To assess the ability of the CS to suppress IL-8 secretion the organoids were seeded in a 48 well plate and grown for 48 hours. Then, organoids were treated with 10% v/v of select CS in 50% L-WRN conditioned medium for 30 min and subsequently stimulated with rhIL-1β (50 ng.ml<sup>-1</sup>) for 24 hours before quantifying IL-8 in the supernatant. Cytotoxicity was assessed using the CytoTox 96® Non-Radioactive Cytotoxicity Assay.

Colonic tissues from C57BL/6 and Winnie mice (n=2) were segmented and the crypts were isolated and cultured. Briefly, the tissues were segmented and washed with PBS, followed by EDTA (8mM) digestion for 1 hour at 4°C and further digested with collagenase type I (2 mg.ml<sup>-1</sup>) (Thermo Fisher Scientific) supplemented with gentamicin (50 µg.ml<sup>-1</sup>) for 15-20 minutes at 37°C. The isolated crypts were washed with complete F12 medium (Identical to complete media except DMEM/F12 was used instead of DMEM) and centrifuged at 50 x g for 5 mins at 4°C. The pellets were then suspended in BME in a 1:1 ratio. Then, 20µl of the mixture was plated in a 24 well tissue culture plate and cultured in 50% L-WRN conditioned medium. The crypts were expanded by serial culture until sufficient numbers were obtained for experimentation.

***Peripheral Blood Mononuclear Cell (PBMC) isolation and immunomodulatory assays.***

PBMCs were isolated by Ficoll gradient density centrifugation. Briefly, 20 ml of freshly drawn

blood was diluted in phosphate buffered saline (1:2) and well mixed. The diluted blood was then carefully layered over Ficoll paque. The tubes were centrifuged without brakes at 400g for 20 minutes at 20°C. The interphase containing mononuclear cells were transferred into a new tube and washed twice in PBS. Prepared cells were stored in liquid nitrogen until required.

***Animal experiments.*** Disease activity was assessed using established protocols. Briefly, the body weights of the mice as well as diarrhoea and rectal bleeding were monitored and recorded daily. Diarrhoea scoring was interpreted as follows: 0 = no diarrhoea, solid stool; 0.5 = very mild diarrhoea, moist but formed stool; 1 = mild diarrhoea, formed but easily bisected by pressure applied with pipette tips; 1.5 = diarrhoea, no fully formed stools, and; 2 = severe, watery diarrhoea with minimal solid present. For histology scoring, the whole colon was rolled, fixed in 10% neutral buffered formalin, and paraffin embedded and sectioned and stained with Haematoxylin and Eosin (H&E) and Alcian blue. Blind assessment of histologic inflammation (increased leukocyte infiltration, neutrophil counts, depletion of goblet cells, crypt abscesses, aberrant crypt architecture, increased crypt length, and epithelial cell damage and ulceration) for proximal, mid and distal colon was performed as previously described. To quantify *in vivo* gene expression, the distal colon was snap frozen and homogenised in TRIzol. RNA was extracted using the Bioline RNA extraction kit according to manufacturer's instructions. RNA concentration was measured using a Nanodrop 1000 spectrophotometer, followed by cDNA synthesis using 1 µg of RNA and the iScript cDNA synthesis kit (BioRad). The expression of genes of interest (Supplementary Table 2) were analysed using quantitative real time PCR (qRT-PCR) as previously described<sup>24,25</sup>. C<sub>t</sub> values were generated, and relative quantitation was determined by the ΔC<sub>t</sub> method.

***GNPS Analyses.*** UHPLC conditions involved 0.5 mL.min<sup>-1</sup> gradient elution from 10% CH<sub>3</sub>CN/H<sub>2</sub>O to 100% CH<sub>3</sub>CN over a period of 4.5 min, with constant 0.1% formic acid,

through an Agilent SB-C<sub>8</sub> 1.7  $\mu\text{m}$ , 2.1  $\times$  150 mm column (Agilent Technologies Inc., Mulgrave, VIC, Australia). The source parameters were: electrospray positive ionisation; mass range of m/z 50-1700; scan rate 10  $\times$  per sec; MS/MS scan rate 3  $\times$  per sec; fixed collision energy 40 eV; source gas temperature 325° C; gas flow 10 L.min<sup>-1</sup>; and nebulizer 20 psig. The scan source parameters were: VCap 4000; fragmentor 100; skimmer 45; and octopole RF Peak 750.

***Analytical fractionation of NF- $\kappa$ B suppressive extract.*** An EtOAc extract (3 mg) of *C. bolteae* AHG0001 cultivated on MCM medium was subjected to analytical HPLC (Agilent Zorbax SB-C<sub>8</sub>, 5  $\mu\text{m}$ , 4.6 mm $\times$ 150 mm column, gradient elution at 1 mL.min<sup>-1</sup> from 10% MeCN/ H<sub>2</sub>O to 100% MeCN over 15 min followed by 2 min wash with 100% MeCN, without TFA modifier) to yield 17 fractions. Only fractions 14-17 demonstrated an ability to suppress NF- $\kappa$ B activity.

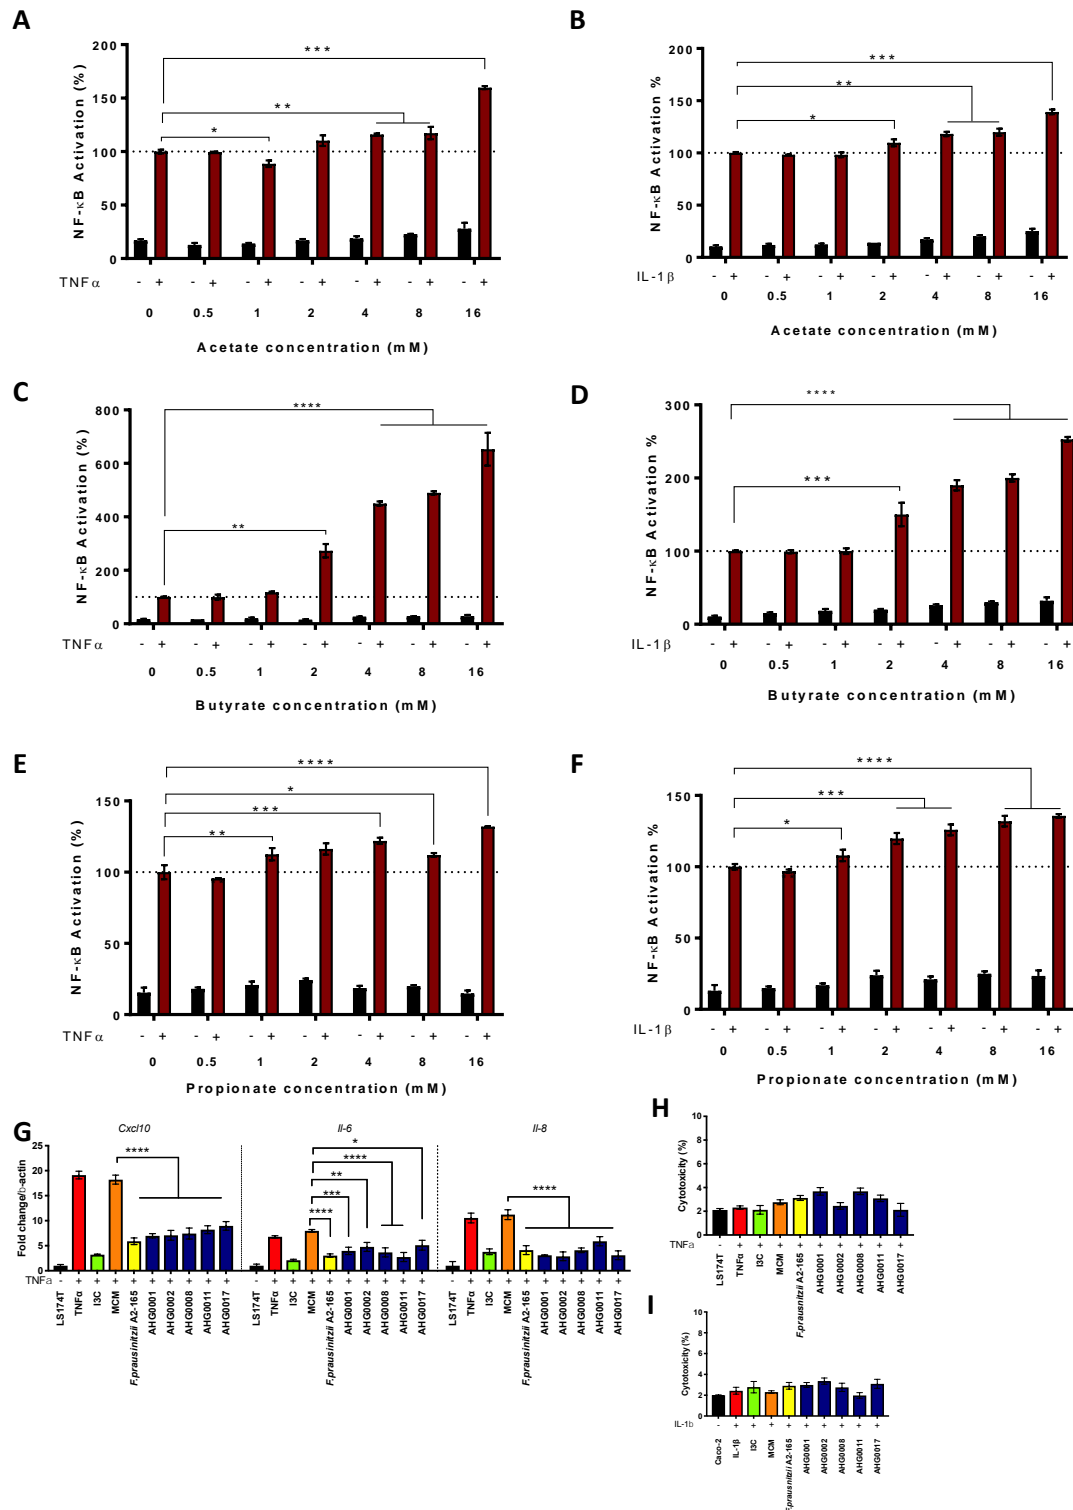

**Supplementary Figure 1A-F.** Assessment of the ability of acetate (Panels A-B), butyrate (Panels C-D) or propionate (Panels E-F) to suppress NF- $\kappa$ B activation in unstimulated or cytokine stimulated LS174T and Caco-2 reporter cells. NF- $\kappa$ B activation was assessed 6h after



TNF $\alpha$  stimulation and the extent of suppression was assessed against sterile medium (mean (SD)). **G.** LS174T based qRT-PCR confirmatory assay of the hits identified from the first pass screen (mean (SD)). *F. prausnitzii* A2-165 and the validated hits suppress IL-1 $\beta$  induced *cxcl10*, *il6* and *il8* expression in LS174T cells. H-I. Analysis of the cytotoxicity of the CS prepared from the NF- $\kappa$ B suppressive strains in LS174T (Panel H) and Caco-2 (Panel I) reporter cells. CS prepared from these strains did not exhibit cytotoxic effects (mean (SD)). \*  $p < 0.05$ , \*\*  $p < 0.01$ , \*\*\*  $p < 0.001$ , \*\*\*\*  $p < 0.0001$  as determined by one-way ANOVA with Dunnett's multiple comparison test.

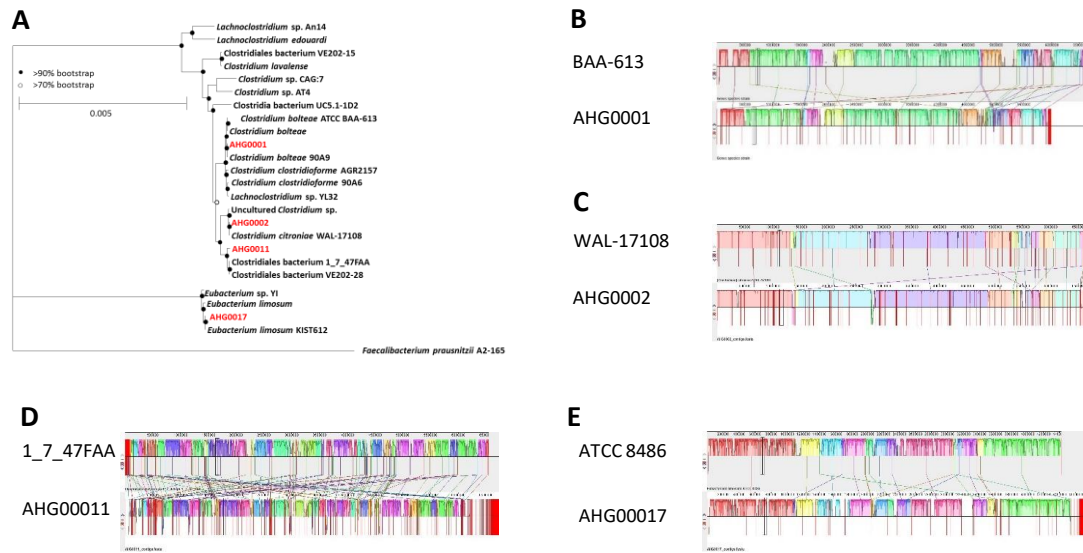

**Supplementary Figure 2A.** GTDB-based phylogeny of *C. bolteae* AHG0001, *C. citroniae* AHG0002, *C. aldenense* AHG0011 and *E. limosum* AHG0017 (red typeface) as determined from the concatenation of 120 universal bacterial-specific marker genes. Representative strains are included for comparative purposes (black typeface). The bootstrap values are indicated using a cut-off of >70 or >90%. B-E. The extent of genome synteny between *C. bolteae* ATCC BAA-613 and *C. bolteae* AHG0001 (Panel B), *C. citroniae* WAL-17108 and *C. citroniae* AHG0002 (Panel C), *C. aldenense* 1\_7\_47FAA and *C. aldenense* AHG0011, and; *E. limosum* ATCC8486 and *E. limosum* AHG0017. The red lines indicate the boundaries of chromosomes, plasmids or contigs.

A

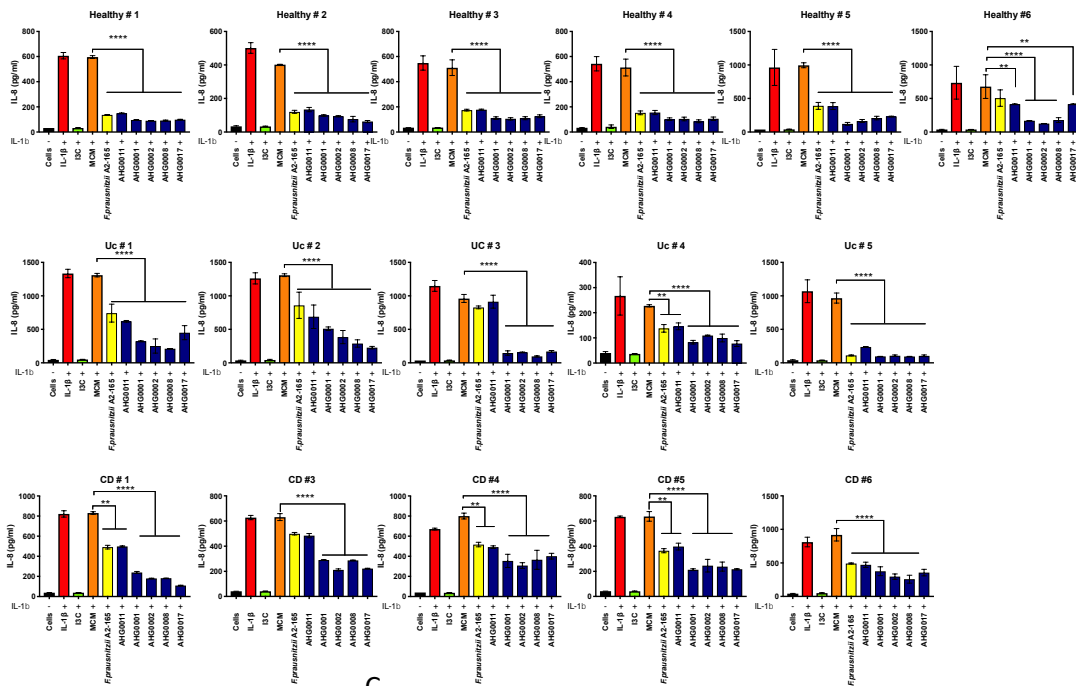

B

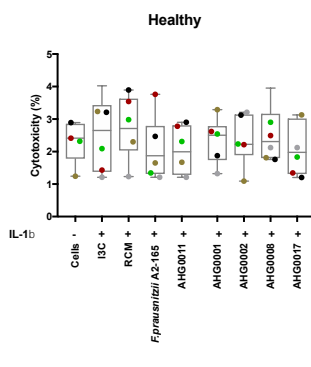

C

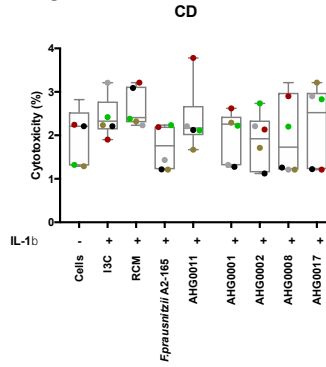

D

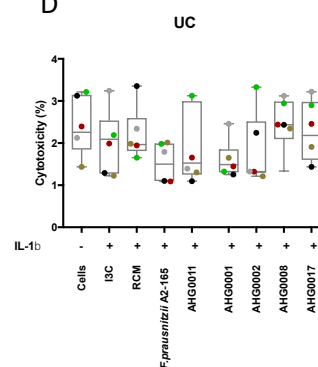

**Supplementary Figure 3A.** Analysis of the ability of CS prepared from the NF- $\kappa$ B suppressive strains to suppress IL-8 secretion in organoids produced from healthy (Healthy, n=6), Crohn's disease (CD, n=5) or ulcerative colitis (UC, n=5) subjects. B. Analysis of the cytotoxicity of the CS prepared from the NF- $\kappa$ B suppressive strains in organoids produced from healthy (Healthy, n=6), Crohn's disease (CD, n=5) or ulcerative colitis (UC, n=5) subjects. \*\*  $p < 0.01$ , \*\*\*\*  $p < 0.0001$  as determined by one-way ANOVA with Dunnett's multiple comparison test.

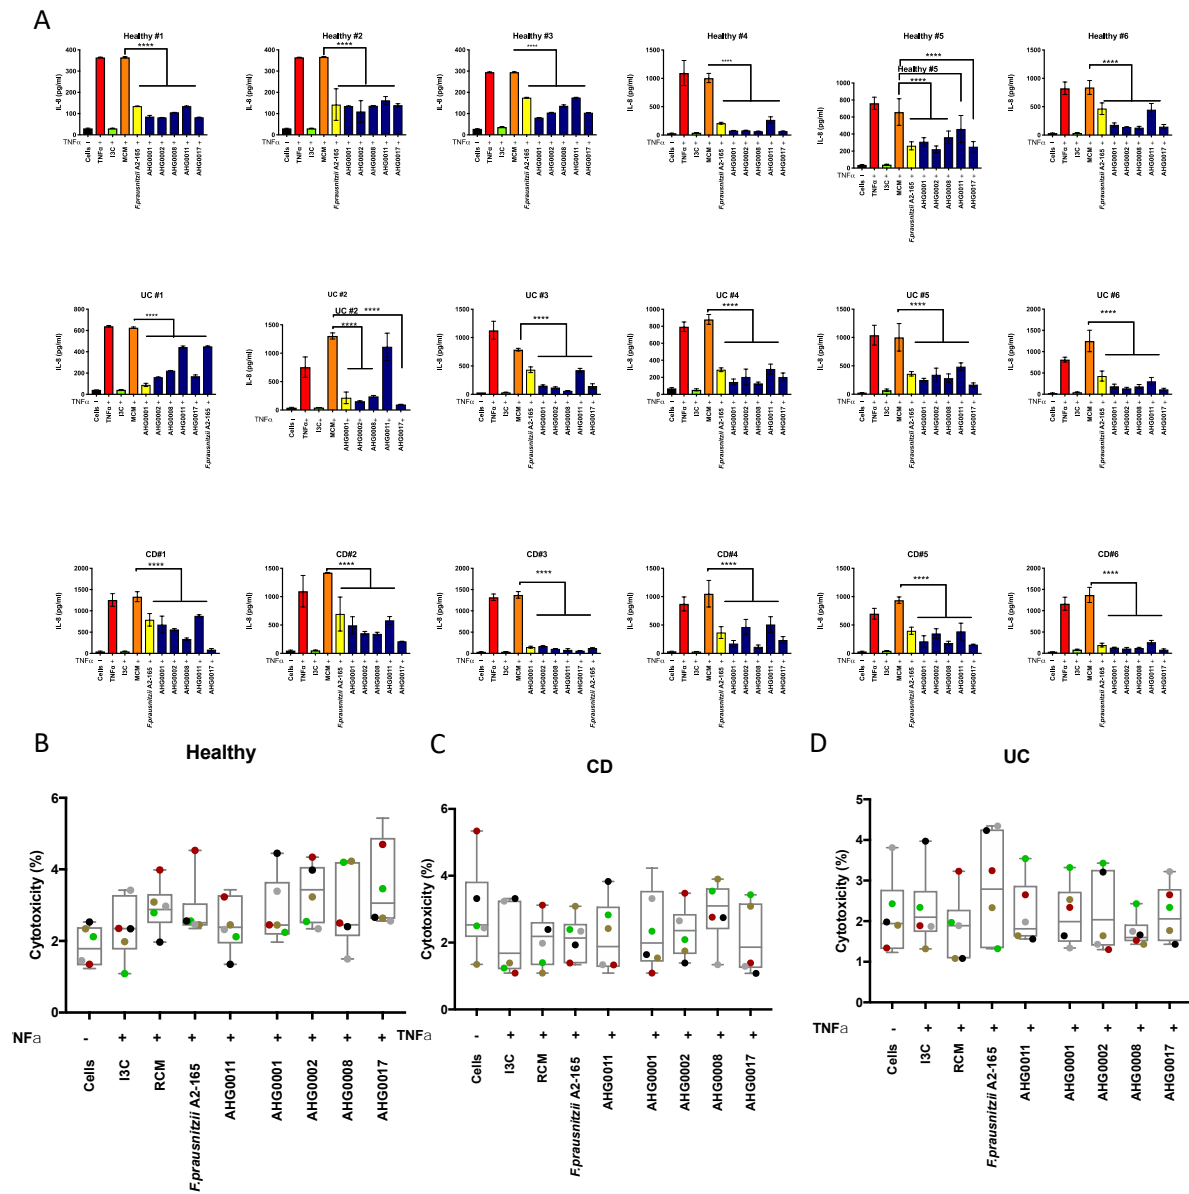

**Supplementary Figure 4.** Analysis of the ability of CS prepared from the NF- $\kappa$ B suppressive strains to suppress IL-8 secretion in PBMCs prepared from healthy (Healthy, n=6), Crohn's disease (CD, n=6) or ulcerative colitis (UC, n=6) subjects. **B.** Analysis of the cytotoxicity of the CS prepared from the NF- $\kappa$ B suppressive strains in PBMCs produced from healthy (Healthy, n=6), Crohn's disease (CD, n=5) or ulcerative colitis (UC, n=5) subjects. \*  $p < 0.05$ , \*\*\*\*  $p < 0.0001$  as determined by one-way ANOVA with Dunnett's multiple comparison test.

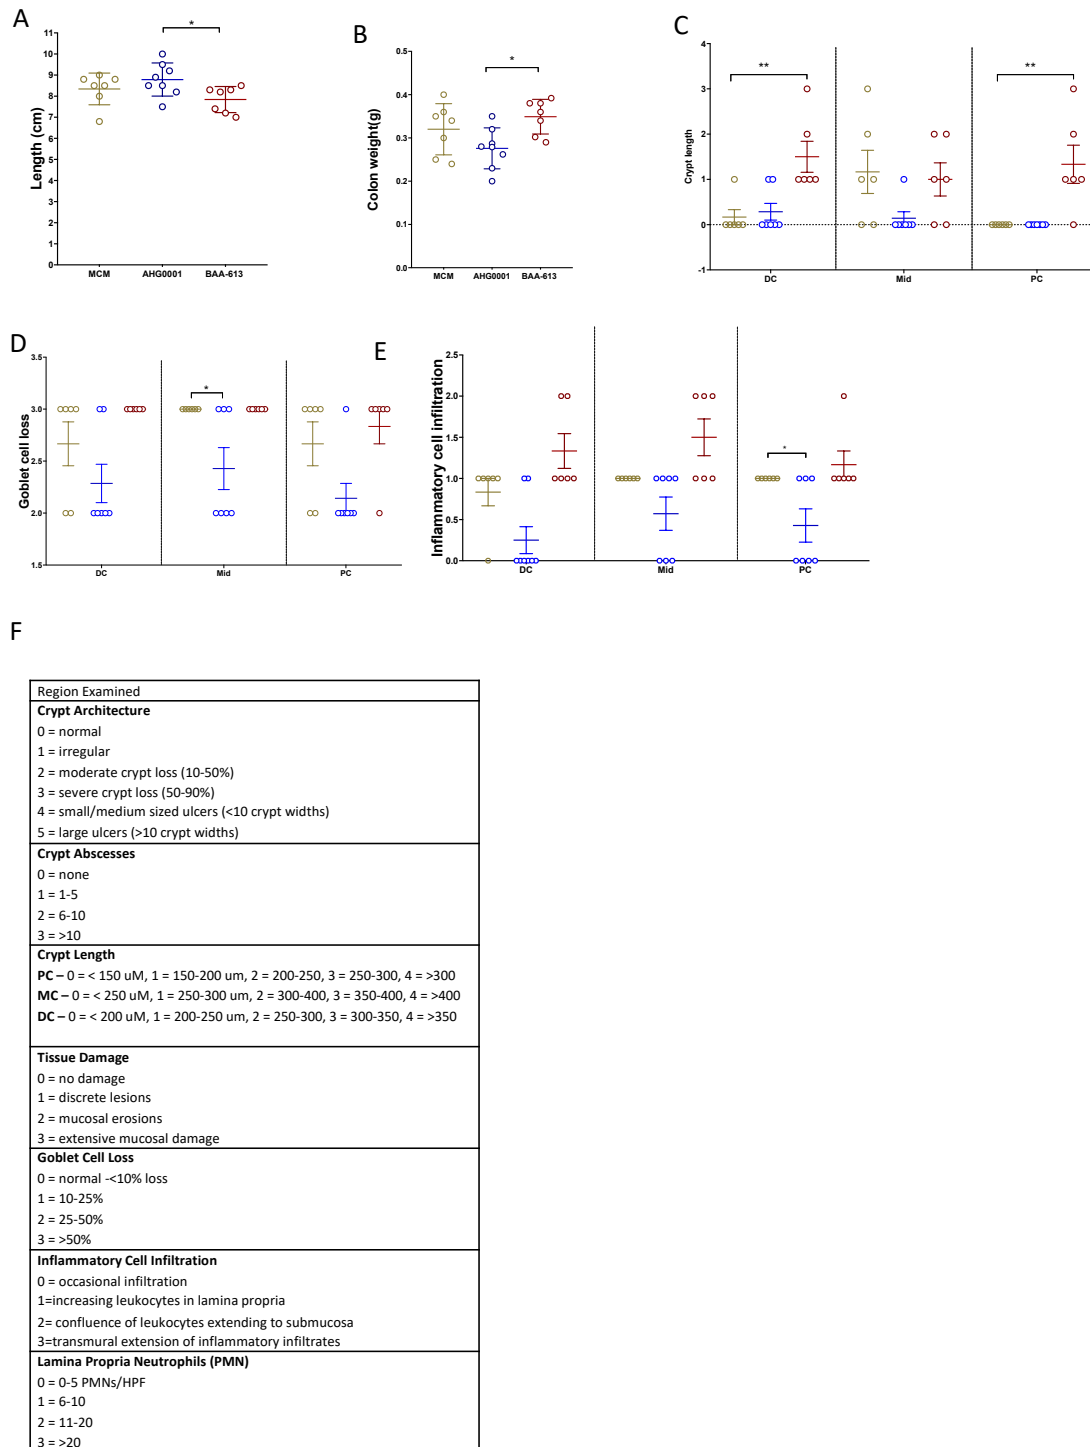

**Supplementary Figure 5.** Histological colonic inflammation sub-scores following the treatment with MCM, *C. bolteae* AHG0001 and *C. bolteae* BAA-613. A. Colon length B. Colon weight C. Crypt length D. Goblet cell loss E. Inflammatory cell infiltration F. Criteria for histology sub score \* $p < 0.05$ , \*\*  $p < 0.01$  as determined by one-way ANOVA with Dunnett's multiple comparison test.

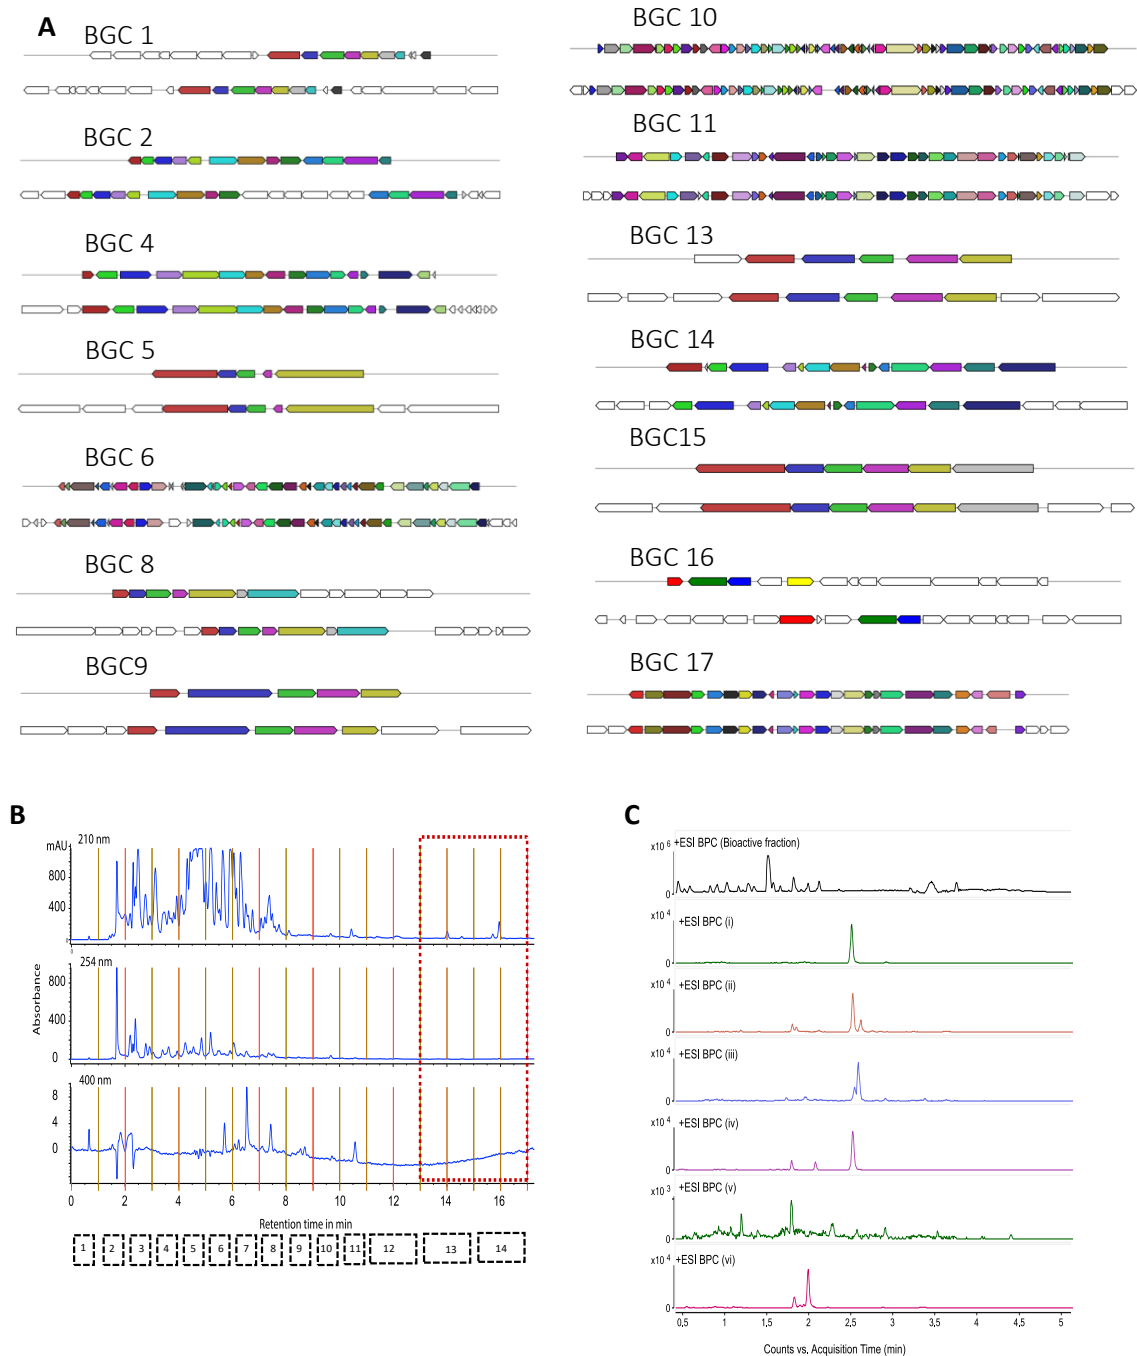

**Supplementary Figure 6A.** Gene organisation of the highly and partially conserved BGCs between *C. bolteae* AHG0001 (top) and *C. bolteae* ATCC BAA-613 (bottom). BGC 12 and BGC 13 are contiguous in *C. bolteae* AHG0001 and this BGC disrupted by a transposon insertion in *C. bolteae* ATCC BAA-613. **B.** Semi-preparative HPLC fractionation of the EtOAc extract of *C. bolteae* AHG0001 cultured in MCM media. The collected fractions are indicated with black dashed boxes and the red dashed box represents the NF- $\kappa$ B suppressive

fractions. C. UPLC-QTOF single ion extraction chromatograms demonstrating that small molecules i-vi (Figure 5Ca) are present in the combined NF- $\kappa$ B suppressive semi-preparative HPLC fractions (see Panel B). BPC = selected base peak ( $m/z$  molecular ion) chromatogram. Small molecules vii-xvi were not present in the active fraction.

**Supplementary Table 1.**

| <b>Details</b> | <b>Organoids</b> |                |              | <b>PBMCs</b>   |            |                 |
|----------------|------------------|----------------|--------------|----------------|------------|-----------------|
|                | <b>Healthy</b>   | <b>CD</b>      | <b>UC</b>    | <b>Healthy</b> | <b>CD</b>  | <b>UC</b>       |
| Age average±SD | 44±12            | 40±10.71       | 38±14.81     | 25±6.39        | 47±19.57   | 31±11.89        |
| (range)        | (29-60)          | (25-54)        | (23-57)      | (21-35)        | (24-74)    | (21-52)         |
| Sex            | 3Male            | 1 Male         | 4 Male       | 2 Male         | 3 Male     | 4 Male          |
|                | 3Female          | 4 Female       | 1 Female     | 4 Female       | 3 Female   | 2 Female        |
| Severity       | N/A              | 2 none         | 1 none       | N/A            | 2 none     | 3 none          |
|                |                  | 3 mild         | 1 mild       |                | 4 moderate | 1 mild,         |
|                |                  |                | 3 moderate   |                |            | 2 moderate      |
| Medication     | none             | 1 anti-TNF,    | 2 IM,        | none           | 5 IM,      | 2 IM,           |
|                |                  | 1 anti-TNF+IM, | 2 IM+ 5-ASA, |                | 1 anti-TNF | 1 5-ASA,        |
|                |                  | 1 IM,          | 1 none       |                |            | 1 5-ASA+IM,     |
|                |                  | 1 5-ASA,       |              |                |            | 1 IM +anti-TNF, |
|                |                  | 1 none         |              |                |            | 1 none          |

IM = Immunomodulator, 5-ASA = 5-aminosalicylic acid



## Supplementary Table 2

| Primer name      | Primer target         | Primer sequence 5'-3'                                           | Reference |
|------------------|-----------------------|-----------------------------------------------------------------|-----------|
| <i>h-cxcl10</i>  | Human <i>cxcl10</i>   | AGC AGA GGA ACC TCC AGT CT<br>TGT GGT CCA TCC TTG GAA GC        | 2         |
| <i>h-il-6</i>    | Human <i>il-6</i>     | CCA CTC ACC TCT TCA GAA CG<br>CAT CTT TGG AAG GTT CAG GTT G     | 2         |
| <i>h-il-8</i>    | Human <i>il-8</i>     | ACT CCA AAC CTT TCC ACC C<br>CCC TCT TCA AAA ACT TCT CCA C      | 2         |
| <i>h-β-actin</i> | Human <i>β-actin</i>  | CCT GTA CGC CAA CAC AGT GC<br>ATA CTC CTG CTT GCT GAT CC        | 18        |
| <i>m-cxcl10</i>  | Murine <i>cxcl10</i>  | TCC TTG TCC TCC CTA GCT CA<br>ATA ACC CCT TGG GAA GAT GG        | 19        |
| <i>m-mip2</i>    | Murine <i>mip2</i>    | ACC ACC AGG CTA CAG GGG CT<br>GGT CCT GGG GGC GTC ACA CT        | 19        |
| <i>m-sxbp1</i>   | Murine <i>sxbp1</i>   | GAG TCC GCA GCA GGT GC<br>CAA AAG GAT ATC AGA CTC AGA ATC TGA A | 19        |
| <i>m-grp78</i>   | Murine <i>grp78</i>   | TGC TGC TAG GCC TGC TCC GA<br>CGA CCA CCG TGC CCA CAT CC        | 20        |
| <i>m-β-actin</i> | Murine <i>β-actin</i> | GAA ATC GTG CGT GAC ATC AAA<br>CAC AGG ATT CCA TAC CCA AGA      | 21        |

## References

1. McSweeney, C.S., Denman, S.E. & Mackie, R.I. in *Methods in gut microbial ecology for ruminants*. (eds. H.P.S. Makkar & C.S. McSweeney) 23-37 (Springer, Dordrecht; 2005).
2. Ó Cuív, P. et al. *Enterococcus faecalis* AHG0090 is a genetically tractable bacterium and produces a secreted peptidic bioactive that suppresses nuclear factor kappa B activation in human gut epithelial cells. *Front. Immunol.* 9 (2018).
3. Quast, C. et al. The SILVA ribosomal RNA gene database project: improved data processing and web-based tools. *Nucleic Acids Res.* 41, D590-D596 (2013).
4. Kumar, S., Stecher, G., Li, M., Knyaz, C. & Tamura, K. MEGA X: Molecular evolutionary genetics analysis across computing platforms. *Mol. Biol. Evol.* 35, 1547-1549 (2018).
5. Ismail, Y. et al. Investigation of the enteric pathogenic potential of oral *Campylobacter concisus* strains isolated from patients with inflammatory bowel disease. *PLoS One* 7, e38217 (2012).
6. Mahendran, V. et al. The prevalence and polymorphisms of zonula occluden toxin gene in multiple *Campylobacter concisus* strains isolated from saliva of patients with inflammatory bowel disease and controls. *PLoS One* 8, e75525 (2013).
7. Ó Cuív, P. et al. The effects from DNA extraction methods on the evaluation of microbial diversity associated with human colonic tissue. *Microb. Ecol.* 61, 353-362 (2011).
8. Bankevich, A. et al. SPAdes: a new genome assembly algorithm and its applications to single-cell sequencing. *J. Comput. Biol.* 19, 455-477 (2012).
9. Parks, D.H., Imelfort, M., Skennerton, C.T., Hugenholtz, P. & Tyson, G.W. CheckM: assessing the quality of microbial genomes recovered from isolates, single cells, and metagenomes. *Genome Res.* (2015).
10. Darling, A.E., Mau, B. & Perna, N.T. progressiveMauve: multiple genome alignment with gene gain, loss and rearrangement. *PLoS One* 5, e11147 (2010).
11. Parks, D.H. et al. A standardized bacterial taxonomy based on genome phylogeny substantially revises the tree of life. *Nat. Biotechnol.* 36, 996 (2018).
12. Weber, T. et al. antiSMASH 3.0-a comprehensive resource for the genome mining of biosynthetic gene clusters. *Nucleic Acids Res.* 43, W237-243 (2015).
13. Medema, M.H., Takano, E. & Breitling, R. Detecting sequence homology at the gene cluster level with MultiGeneBlast. *Mol. Biol. Evol.* 30, 1218-1223 (2013).
14. Zhang, J.-H., Chung, T.D.Y. & Oldenburg, K.R. A simple statistical parameter for use in evaluation and validation of high throughput screening assays. *Journal of Biomolecular Screening* 4, 67-73 (1999).
15. Junker, L.M. & Clardy, J. High-throughput screens for small-molecule inhibitors of *Pseudomonas aeruginosa* biofilm development. *Antimicrobial agents and chemotherapy* 51, 3582-3590 (2007).
16. Malo, N., Hanley, J.A., Cerquozzi, S., Pelletier, J. & Nadon, R. Statistical practice in high-throughput screening data analysis. *Nature biotechnology* 24, 167-175 (2006).
17. VanDussen, K.L. et al. Development of an enhanced human gastrointestinal epithelial culture system to facilitate patient-based assays. *Gut* 64, 911-920 (2015).
18. Maudet, C. et al. Functional high-throughput screening identifies the miR-15 microRNA family as cellular restriction factors for *Salmonella* infection. *Nat Commun* 5, 4718 (2014).
19. Hasnain, S.Z. et al. Glycemic control in diabetes is restored by therapeutic manipulation of cytokines that regulate beta cell stress. *Nat Med* 20, 1417-1426

- (2014).
20. Gulhane, M. et al. High fat diets induce colonic epithelial cell stress and inflammation that is reversed by IL-22. *Sci. Rep.* 6, 28990 (2016).
  21. Heazlewood, C.K. et al. Aberrant mucin assembly in mice causes endoplasmic reticulum stress and spontaneous inflammation resembling ulcerative colitis. *PLoS Med.* 5, e54 (2008).
